1 **Pangenome analysis of the soil-borne fungal phytopathogen *Rhizoctonia solani***  
2 **and development of a comprehensive web resource: RsolaniDB**

3 Kaushik, A.<sup>1</sup>, Roberts, D.P.<sup>2</sup>, Ramaprasad A.<sup>1</sup>, Mfarrej, S.<sup>1</sup>, Mridul Nair<sup>1</sup>, Lakshman, D.K.\*<sup>2</sup> and  
4 Pain, A.\*<sup>1,3</sup>

5  
6 <sup>1</sup>Biological & Environmental Science & Engineering Division, KAUST, Thuwal 23955-6900,  
7 Saudi Arabia

8  
9 <sup>2</sup>Sustainable Agricultural Systems Laboratory, USDA-ARS, Beltsville, MD 20705, USA

10 <sup>3</sup>Research Center for Zoonosis Control, Global Institution for Collaborative Research and  
11 Education (GI-CoRE); Hokkaido University, Sapporo, 001-0020 Japan

12  
13

14 \* Corresponding authors

15  
16

17 **Abstract**

18 *Rhizoctonia solani* is a collective group of genetically and pathologically diverse  
19 basidiomycetous fungus that damages economically important crops. Its isolates are classified  
20 into 13 Anastomosis Groups (AGs) and subgroups having distinctive morphology and host  
21 range. The genetic factors driving the unique features of *R. solani* pathology are not well  
22 characterized due to the limited availability of its annotated genomes. Therefore, we performed  
23 genome sequencing, assembly, annotation and functional analysis of 12 *R. solani* isolates  
24 covering 7 AGs and selected subgroups (AG1-IA, AG1-IB, AG1-IC, AG2-IIIB, AG3-PT  
25 (isolates Rhs 1AP and the hypovirulent Rhs1A1), AG3-TB, AG4-HG-I (isolates Rs23 and R118-  
26 11), AG5, AG6, and AG8), in which six genomes are reported for the first time, wherein we  
27 discovered unique and shared secretomes, CAZymes, and effectors across the AGs. Using a  
28 pangenome comparative analysis of 12 *R. solani* isolates and 15 other basidiomycetes, we also  
29 elucidated the molecular factors potentially involved in determining the AG-specific host  
30 preference, and the attributes distinguishing them from other Basidiomycetes. Finally, we present  
31 the largest repertoire of *R. solani* genomes and their annotated components as a comprehensive  
32 database, viz. RsolaniDB, with tools for large-scale data mining, functional enrichment and  
33 sequence analysis not available with other state-of-the-art platforms, to assist mycologists in  
34 formulating new hypotheses.

35

## 36 **Introduction**

37 *Rhizoctonia solani* Kühn (teleomorph: *Thanatephorus cucumeris* [Frank] Donk) is considered as  
38 one of the most destructive soil borne plant pathogens causing various diseases including pre-  
39 and post-emergence damping-off of seedlings, crown and root rots, black scurf of potato, take-all  
40 of wheat, sheath blight of rice and maize, brown patch of turf, and postharvest fruit rots (1, 2).  
41 This necrotrophic fungus infects a wide range of economically important plant species,  
42 belonging to more than 32 plant families and 188 genera, and is responsible for 15% to 50%  
43 agricultural damages annually (3). Broadly, it is classified among 13 Anastomosis Groups (AGs)  
44 with distinctive morphology, physiology, pathogenicity host range, and highly divergent genetic  
45 composition (4). Most *R. solani* AGs are further divided into subgroups, also called IntraSpecific  
46 Groups (ISGs), which differ in pathogenicity, virulence, ability to form sclerotia, growth rate,  
47 and host range preference (5). Although field isolates of *Rhizoctonia* infected plants are usually  
48 found to be infested with one or more AGs, each AG subgroup can still have its own host  
49 preference. For instance, *Arabidopsis thaliana*, was found to be susceptible to AG2-1 sub-group  
50 isolates but resistant to AG8 isolates (6), which suggests that genetic divergence is the inherent  
51 characteristic of *Rhizoctonia* species.

52 Over the last two decades, our understanding of the genetic divergence among different  
53 *R. solani* AGs has improved to the point that it is now evident that all AGs and their sub-groups  
54 are genetically isolated, non-interbreeding populations (7). The rapid and relatively low-cost of  
55 generation of genomic sequences and other ‘omics’ datasets has played a significant role in  
56 furthering our understanding of the host-pathogen interactions and ecology of *Rhizoctonia*  
57 species. (8–12). The analysis of these genomic sequences and functional components revealed  
58 several novel or previously unrecognized classes of *R. solani* genes among different AGs that are

59 involved in pathogenesis in a host-specific manner, e.g. effector proteins and carbohydrate-active  
60 enzymes (CAZymes) (13). Additionally, analysis of differentially expressed genes in different  
61 isolates has enabled researchers to predict the adaptive behavior of this fungus in different hosts  
62 and the associated virulence (14, 15). However, the majority of this information has come from  
63 the analysis of isolates belonging to only a small number of AGs for which complete genome  
64 and/or transcriptome sequences are available. In fact, until now, draft genome assemblies  
65 belonging to only 4 of the 13 AGs have been reported viz. AG1-IA (16), AG1-IB (17), AG2-  
66 2IIIB (13), AG3-Rhs1AP (18), AG3-PT isolate Ben-3 (19) and AG8 (20). This limited  
67 availability of genome sequences and the predicted proteomes across the 13 different AGs and  
68 their subgroups is one of the important barriers hindering the understanding of functional  
69 complexity and temporal dynamics in *R. solani* AGs and their subgroups.

70         In this study, we report whole-genome sequencing, assembly and annotation of 12  
71 *Rhizoctonia* isolates from 7 AGs; of which genome sequences of three AGs (AG4, AG5, and  
72 AG6), two subgroups (AG1-IC and AG3-TB {or AG3-T5}) and a hypovirulent isolate (AG3-  
73 1A1) of the subgroup AG3-PT are being reported for the first time. The draft genome of the  
74 AG3-PT isolate 1AP (alternatively named as Rhs1AP) was previously reported (Cubeta et. al.,  
75 2014) (18), but was re-sequenced for comparative purposes, as AG3-1AP. Furthermore, to  
76 understand genetic diversity among different *R. solani* isolates, we performed inter-proteome  
77 comparative analyses, including ortholog analysis at the pangenome level and protein domains  
78 profiling for secreted components, virulent proteins, and CAZymes in all 12 *R. solani* isolates.  
79 To make these high-quality draft *R. solani* genomes and features readily accessible to a broad  
80 audience of researchers, we built a comprehensive and dedicated web resource, viz. RsolaniDB,  
81 for hosting and analyzing the available genomic information predicted at the transcript-, and



82 protein-level in different *R. solani* AGs. The presented web-resource includes detailed  
83 information on each *R. solani* isolate, such as the genome properties, predicted gene, transcript  
84 and protein sequences, predicted gene function, and protein orthologues among other AG sub-  
85 groups, along with tools for Gene Ontology (GO) and pathway enrichment analysis, sequence  
86 analysis, and visualization of gene models.

## 87 **Materials and Methods**

### 88 **Isolation of genomic DNAs for sequencing**

89 Details regarding *R. solani* isolates used for sequence analyses are presented in Table S1 and S2.  
90 Fungal cultures were purified by the hyphal tip excision method (21) and maintained by sub-  
91 culturing on potato dextrose agar (PDA, Sigma Aldrich catalog # P2182, St. Louis, MO, USA).  
92 The PDA was amended with kanamycin (25 µg/ml) and streptomycin (50 µg/ml) to inhibit  
93 bacterial growth. Isolates were grown in Potato Dextrose Broth (PDB, Sigma Aldrich catalog #  
94 P6685) broth at 100 rpm and 25 C for 4 to 6 days, mycelia collected by filtration through 2 layers  
95 of sterile cheese cloth, washed 2 X with sterile distilled water, gently squeezed and placed on 4  
96 layers of paper towel to remove surface water, and then snap-frozen in liquid nitrogen and stored  
97 at -80 C till use. Genomic DNA was extracted from mycelia using both the CTAB method (22)  
98 and a protocol recommended by the manufacturer (User-Developed Protocol: Isolation of  
99 genomic DNA from plants and filamentous fungi using the QIAGEN® Genomic-tip, Qiagen  
100 Inc.). RNA was extracted from fungal isolates and from tobacco detached leaves infected with  
101 corresponding fungal isolates, using the Qiagen RNeasy Plant Mini Kit (Qiagen Inc.  
102 Germantown, MD, USA). Extracted genomic DNA and RNA was quantified with a Qubit Flex  
103 Fluorometer (Thermo Fisher Scientific, Waltham, MA, USA). AG and subgroup identity of the

104 fungal isolates was verified by ITS-PCR, sequencing and homology analysis with nucleotide  
105 sequences available in the NCBI database (23).

### 106 **RNA extraction**

107 *Nicotina tabacum* seedlings were raised to four-leaf stage on potting mix (Pro-mix, Premier  
108 Horticulture, USA) in the greenhouse at ambient temperature (22° - 24° C) and with four hours  
109 supplemental light with a mercury lamp. Two leaves were excised from each seedling and placed  
110 on a tray on two piece of wet paper towels. For inoculation, seven to eight agar plugs from the  
111 margin of fresh *R. solani* growth on 1/4<sup>th</sup> concentration of PDA (potato dextrose agar) were  
112 placed on the adaxial surface of each leaf. For control, only seven to eight agar plugs from 1/4<sup>th</sup>  
113 PDA were placed. Each tray was closed with a lid and incubated on lab bench at ambient  
114 temperature and light.

115 After 5 days, yellow to necrotic symptoms were noticeable on *R. solani* treated leaves but no  
116 symptoms appeared on control leaves surrounding the plugs. The control and infected patches  
117 were excised with a sterile scalpel, snap frozen in liquid nitrogen and processed for RNA  
118 extraction with RNeasy Plus Mini Kit in RLC buffer (Qiagen Sciences Inc., Germantown, MD,  
119 USA). The purified RNA was treated with DNase at 37° C for 30 min, extracted with phenol and  
120 Phenol: chloroform, precipitated with ethanol, and dissolved in RNase-free water.

### 121 **Construction of genomic and RNA libraries and sequencing**

122 For making genomic libraries, an input of 500ng of DNA from each sample was sheared on  
123 Covaris (Covaries E series) and paired-end libraries were prepared for sequencing using  
124 Illumina's HiSeq 2000 platform. From end repair until adapter ligation and purification steps of  
125 the paired-end libraries were prepared using the protocol "Illumina library prep" on the IP-Star  
126 automated platform from Diagenode (Diagenode IP Star) as per the manufacturer's protocol.

127 Post ligation, manual protocols were used for gel size selection and PCR amplification using the  
128 standard Illumina PCR Cycle (Kapa high-fidelity master mix). The prepared libraries were  
129 analyzed on bioanalyzer and quantified using Qubit (Thermo Fisher). The normalized libraries  
130 were pooled for sequencing (insert size of 500bp) and submitted for HiSeq 2000 sequencing at  
131 Bioscience Core Laboratory of King Abdullah University of Science and Technology.  
132 Strand-specific mRNA sequencing was performed from total RNA using TruSeq Stranded  
133 mRNA Sample Prep Kit LT (Illumina) according to manufacturer's instructions. Briefly, polyA+  
134 mRNA was purified from total RNA using oligo-dT dynabead selection. First strand cDNA was  
135 synthesised using randomly primed oligos followed by second strand synthesis where dUTPs  
136 were incorporated to achieve strand-specificity. The cDNA was adapter-ligated and the libraries  
137 amplified by PCR. Libraries were sequenced in Illumina Hiseq2000 with paired-end 100bp read  
138 chemistry.

### 139 ***De novo* assembly, genome annotation and bioinformatic analysis**

140 *Data preprocessing.* Adapter sequences in genomic reads in FASTQ format were trimmed using  
141 the trimmomatic tool (version 0.35) (24), followed by trimming low-quality bases at read ends.  
142 Read quality was evaluated using the fastqc tool (version 0.11.8) (25). Reads with length < 20 bp  
143 and average quality score < 30 were also removed. For genome heterogeneity analysis, *k-mer*  
144 distribution analysis on resulting DNaseq reads was performed using jellyfish (version 2.2.10)  
145 (26), which estimated best *k-mer* length for each genome. Histogram distributions of different *k-*  
146 *mers* for the best *k-mer* length was plotted using the *-histo* module of the jellyfish program. In  
147 addition, the available raw RNAseq paired-end reads (Table S2) were quality trimmed and  
148 preprocessed using with the same approach used for DNaseq reads. The quality trimmed reads  
149 were then subjected to *denovo* assembly using Trinity which predicted transcript sequences (27).

150 *Genome assembly.* Quality trimmed reads were subjected to *denovo* genome assembly using  
151 SPAdes (version 3.7.0) in which a defined range of *k-mer* lengths (21,33,55,65,77,101 and 111)  
152 was used for contig formation (28). Quast (version 4.5) was used for quality evaluation of  
153 predicted contigs (29). Scaffolds were subsequently predicted from contigs using SSPACE  
154 (version3.0) (30) and gaps in assembled scaffolds filled using five consecutive runs of GapCloser  
155 (version 1.12) (31). For samples with RNAseq dataset available, genome scaffolding was further  
156 improved using the Rascaf program (32). Genome quality was evaluated with BUSCO (version  
157 3.0.1) (33) and scaffolds subjected to ITSx (version 1.1) (34) for ITS sequence prediction.  
158 Thereafter, phylogenetic tree was constructed with megax software (35) using the neighborhood  
159 joining method (10000 bootstraps), in which ITS2 sequences were aligned using ClustalW (36).  
160 The resulting tree was saved in the newick format and visualized together using Phylogeny.IO  
161 (37) and ETE toolkit (38). Redundans python script was then used to predict the homozygous  
162 genome by reducing the unwanted redundancy to improve draft genome quality (39). Resulting  
163 scaffolds were aligned with mitochondrial genomes of *R. solani* and other Basidiomycota using  
164 blastn program (version 2.6.0; e-value  $\leq 1e^{-5}$ ) (40) and mapped mitochondrial contigs were  
165 removed to retain only the nuclear genome for subsequent annotation.

166 *Genome annotation.* The draft genome was annotated using the MAKER (version 2.31.8)  
167 pipeline(41), which predicted intron/exon boundaries, transcript and protein sequences. For the  
168 annotation, repeat regions were masked using RepeatMasker (version 4.0.5; model\_org=fungi)  
169 (42). Protein homology evidence was taken from UniProt protein sequences (Reviewed; family:  
170 Basidiomycota) (43). For EST evidences, RNAseq reads were assembled into transcripts using  
171 Trinity *denovo* assembler (version 2.0.6) (27). For genomic datasets without corresponding  
172 RNAseq datasets available, the EST sequences of alternate organisms were used from previously

173 published *R. solani* genome annotations viz. AG1-IA (16), AG1-IB (17), AG2-2IIIB (13), AG3-  
174 Rhs1AP (18), AG3-PT isolate Ben-3 (19) and AG8 (20). The functional domains, PANTHER  
175 pathways (44) and Gene Ontology (GO) terms (45) in the predicted protein sequences were  
176 assigned using InterProScan (version 5.45-80.0) standalone program (46). The functional  
177 domains assigned to each protein included the information from ProSiteProfiles (47), CDD (48),  
178 Pfam (49) and TIGRFAMs (50), resulting in the annotated genome in GFF3 format using  
179 `iprscan2gff3` and `ipr_update_gff` programs (46).

180 The fungal AROM protein sequences were identified by mapping the *R. solani* proteome on  
181 pentafunctional AROM polypeptide sequences from UniProt (organism Fungi) using `blastp` (e-  
182 value  $\leq 0.001$ ) (40). The resulting candidate AROM sequences in each *R. solani* proteome were  
183 analyzed using HMMER webserver (51). We also identified the predicted secreted proteins in  
184 each of the *R. solani* proteomes using `signalp` (version 5.0) (52). For identification of proteins  
185 with a transmembrane domain `phobius` (version 1.01) (53) was used. We used `targetp` (version  
186 1.1) to predict proteins with mitochondrial signal peptides (54). However, since we already  
187 removed mitochondrial contigs from assembled genomes, we did not observe any proteins with a  
188 mitochondrial signal peptide. Effector proteins in each *R. solani* secretome were predicted using  
189 `effectorP` webserver (version 2.0) (55). The Carbohydrate Active enZyme (CAZyme) in *R. solani*  
190 proteomes were predicted using `dbCAN2` webserver, in which only the proteins predicted by at  
191 least two prediction methods were considered (56). The CAZyme family predicted by HMMER  
192 was used for the selected proteins.

193 *Orthology*. Orthologous proteins across all proteomes were identified with `orthoMCL` clustering  
194 using the `Synima` program (57, 58), which identified core, unique and auxiliary regions in each  
195 *R. solani* proteome. This program was also used for predicting genome synteny using inter-

196 proteome sequence similarity. ShinyCircos was used for circular visualization of synteny plots  
197 (59, 60).

## 198 **RsolaniDB database development**

199 The RsolaniDB (RDB) database was built to host *R. solani* reference genomes, transcript and  
200 protein sequences in FASTA format, along with genome annotations included in GFF3 format.  
201 For each genome, the information in the database was structured as entries, in which each entry  
202 included a list of details about a given transcript and protein, i.e., intron-exon boundaries;  
203 predicted functions; associated pathways and GO terms; predicted sequences; orthologs and  
204 functional protein sequence domains predicted from InterPro, PrositeProfile and Pfam. The  
205 identifier format for each entry (i.e., RDB ID) start with 'RS\_' and AG subgroup name followed  
206 by a unique number. We also included five previously published *R. solani* annotated genome  
207 sequences (i.e., AG1-1A, AG1-1B, AG2-2IIIB, AG3-PT and AG8) with their gene identifiers  
208 converted into the RDB ID format. The database was written using DHTML and CGI-BIN Perl  
209 and MySQL language, to allow users perform list of tasks, including text-based search for the  
210 entire database; or in AG-specific manner. We also included a list of tools to assist users in  
211 performing number of down-stream analysis, including RDB ID to protein/transcript sequence  
212 conversion; FASTA sequence-based BLAST search on entire database or AG-specific manner;  
213 tool to retrieve orthologs for a given set of RDB IDs along with tools for functional enrichment  
214 analysis. The GO-based functional enrichment tool for gene set analysis of given RDB IDs was  
215 build using topGO R package (61). Whereas the pathway-based gene set analysis was developed  
216 to predict significantly enriched PANTHER pathway IDs for a given set of RDB IDs.

## 217 **Results**

### 218 **Genome-wide comparative analysis of *R. solani* assemblies and its annotation**

219 We performed the high-depth sequencing, *denovo* genome assembly and annotation of 12 *R.*  
220 *solani* isolates. For qualitative evaluation of these assemblies, we used genome sequences of a  
221 basidiomycetous mycorrhizal fungus *Tulasnella calospora* (Joint Genome Institute fungal  
222 genome portal MycoCosm (<http://genome.jgi.doe.gov/Tulca1/Tulca1.home.htm>) and *R. solani*  
223 AG3-PT as negative and positive controls, respectively. Overall, the draft genome assemblies of  
224 the *R. solani* isolates shows remarkable differences in the genome size, ranging anywhere from  
225 the smaller AG1-IC (~33 Mbp) to the larger AG3-1A1 (~71 Mbp) isolate genomes (Table S3).  
226 The number of contigs generated are also highly variable ranging between 678-11,793, in which  
227 the newly reported assemblies of AG1-IC and AG3-T5 has highest N50 lengths of 1,00,597 bp  
228 and 1,96,000 bp respectively (Table S3). The heterogeneity in genomic reads was predicted by  
229 analyzing the distribution of different *k-mers* in *R. solani* genomic sequencing reads. The  
230 analysis reveals a shoulder peak along with the major peak in *k-mer* frequencies for AG2-2IIIB,  
231 AG3-1A1, AG3-1AP and AG8, indicating the possible heterogeneity of these genomic reads of  
232 these isolates (Figure S1). The G+C content ranged from 47.47% to 49.07%, with a mean of  
233 48.43% (Table S3). The quality of these draft genomes was evaluated using BUSCO with scores  
234 ranging between ~88-96% (Table S3), indicating the completeness of essential fungal genes in  
235 the predicted assemblies. In order to evaluate the reliability of the genome assemblies, we further  
236 compared our draft genomes with previously published assemblies of *R. solani* isolates, i.e.,  
237 AG1-IA, AG1-IB, AG2-2IIIB, and AG8 (Figure S2). The mummer plot (62) comparison shows  
238 the overall co-linearity and high similarity among similar assemblies, wherein AG8 assemblies  
239 are least co-linear, possibly due to the heterokaryotic nature of the AG8 genome (20, 63). Among  
240 the presented draft genome sequences, a large number of syntenic relationships (Figure 1A) are  
241 also identified (length > 40,000bp), wherein all the given isolates share at least four highly

242 similar syntenic region, except *T. calospora* (outgroup), which does not share any syntenic  
243 region with *R. solani* isolated for the given threshold of > 40,000 bp (Figure 1B). Similarly, our  
244 analysis shows that AG5, AG2-2IIIB and AG3-1A1 shares comparatively lower syntenic  
245 regions, whereas AG3-PT (positive control) shares highest number of syntenic regions with other  
246 *R. solani* isolates. In fact, we observed that most of the closely related AGs share large number  
247 of syntenic relationships, e.g., high similarity among AG3 sub-groups. Overall, the analysis  
248 exhibits the first line of evidence that indicates widespread collinearity and regions of large  
249 similarity across genetically distinct isolates, with *T. calospora* as an outlier.

250 Subsequently, we performed the ITS2-based phylogeny to compare the ITS2 sequences of the 12  
251 newly sequenced *R. solani* isolates with that of the known *R. solani* tester strains (as positive  
252 controls) and *T. calospora* as an outgroup (Figure 1C), wherein for AG3-PT, we were not able  
253 not predict the ITS sequences. The observed phylogenetic clusters of AGs reflect strong  
254 similarity in ITS2 sequences of assembled genomes with respect to that of tester strains of *R.*  
255 *solani*. For instance, the AG1-IA cluster includes four strains, all belonging to same AG, *i.e.*,  
256 AG1-IA. Similarly, ITS2 sequences of different AG3 and AG4 subgroups are clustered within  
257 their respective clade, whereas the outgroup *T. calospora* shows distinct architecture, providing  
258 strong evidence in favor of the correct methods used for genome assemblies. Intriguingly, the  
259 ITS2 sequences of AG8 subgroup shows remarkable differences, in which sequence of tester  
260 strain (*i.e.*, AG-8-A68), previously published genome sequence (*i.e.*, AG8-01) and from the  
261 reported genome of this study (*i.e.*, AG8-Rh89/T) are clustered across different clade of the  
262 phylogenetic tree.

263         One of the important proteins known to be strongly associated with fungal evolution and  
264 virulence is the penta-functional AROM sequence, with characteristic five domains (64). Here,



265 we characterized the AROM protein sequences in the predicted proteome of all given assemblies  
266 (Figure S3). We observed at least one penta-functional AROM sequence in each of the  
267 assemblies, in which sequence(s) are present in either complete or partial form. Interestingly,  
268 AG3-1A1 has two complete penta-functional AROM protein sequences, a characteristic not  
269 observed in any other AG. In AG5, two partial AROM sequences are observed that together  
270 completed all five domains observed in the complete penta-functional AROM sequence (65).  
271 Although, all assemblies are found to have contiguous AROM protein sequences, the partial  
272 AROM sequences in AG5 may represent a fragmented region of the genome assembly and,  
273 therefore, warrants further experimental investigations and genome assembly improvements.

#### 274 **Genome-wide orthologous protein clustering and functional analysis**

275 Intron/exon and transcript boundaries were identified using the maker pipeline (see materials and  
276 methods), which predicted 7,394 to 10,958 protein coding transcripts per genome (excluding *T.*  
277 *calospora*, Figure S4) in which AG3-1A1 genome has the highest number of transcripts. Next,  
278 using OrthoMCL, the translated protein sequences in all genomes were clustered into the  
279 orthologous groups, where each cluster of proteins represented a set of similar sequences likely  
280 to represent a protein family. The similarities among the given isolates were enumerated by  
281 measuring proteins shared by different proteomes in the same orthoMCL clusters (Figure 2A).  
282 As expected, this analysis clearly outgroup *T. calospora*, indicating that it has a different protein  
283 family composition than *R. solani* isolates. Although, AG1 and AG4 subgroups, AG3-1A1 and  
284 AG3-1AP shows expected similarities and share similar clustering profiles, AG3-PT and AG5  
285 shows a divergent profile of protein families with respect to the other AGs under study.  
286 Nevertheless, a large set of orthoMCL clusters share proteins from all/most of the *R. solani*  
287 isolates which further indicates inherent similarities as well as unique attributes across these

288 pathologically diverse groups of fungi. For instance, more than 1,400 orthoMCL clusters are  
289 composed of proteins belonging to only two AGs, whereas >1,500 clusters are composed of  
290 proteins from all 13 *R. solani* isolates and *T. calospora* (Figure 2B). It is expected that these  
291 conserved clusters are composed of proteins from core gene families with essential functions,  
292 whereas other clusters may host proteins with unique AG-specific roles (Figure 2C). The  
293 analysis reveals that AG1-1C, AG2-2IIIB, AG5, AG6-10EEA and AG8 are composed of large  
294 number of unique proteins (>1,000 proteins), whereas AG3-1A1 has the highest number of core  
295 and auxiliary proteins. The pair-wise comparison of the number of clusters shared by any two  
296 AGs highlighted that AG3-1AP shares the highest number of orthoMCL clusters with AG3-1A1,  
297 a sector derived hypo-virulent isolate of AG3-1AP (Figure 2D) (66). In fact, AG3-1A1 proteins  
298 shares large number of clusters with few other AG subgroups too, including AG1-1C, AG6-  
299 10EEA, AG2-2IIIB and AG4-R118.

300 To investigate the functional composition of proteins using orthologous groups  
301 information, we performed InterPro domain family analysis of proteomes from each AG (Figure  
302 S5). Interestingly, the core proteome of most AGs is composed of ~2,000 InterPro domain  
303 families, whereas the unique proteome per AG ranged between 101 (for AG3-PT) to 628 (for  
304 AG3-1A1). Wherein, the most common protein family that made the unique proteome of *R.*  
305 *solani* subgroups is “Cytochrome P450”, which is essential for fungal adaptations to diverse  
306 ecological niches (67) (Figure 3). Similarly, proteins with WD40 repeats are found to be the  
307 most common set of the unique proteome in most AGs. In addition, few of the AG subgroups are  
308 found to be enriched with a protein family that is significantly associated with its unique  
309 proteome only, possibly being involved in the survival of that AG in respective hosts. For  
310 instance, the AG1-IB unique proteome is enriched with “NADH: Flavin Oxidoreductase/ NADH

311 oxidase (N-terminal)”, similarly AG3-1A1 is enriched with “ABC transporter-like” and  
312 “Aminoacyl-tRNA synthetase (class-II)” InterPro domains. Whereas AG3-PT is found to be  
313 uniquely enriched with “Ribosomal protein S4/S9” and AG3-1A1 is uniquely enriched with  
314 "Multicopper oxidase (Type 2)" and "Patatin like phospholipase domain".

### 315 **The predicted secretome and effector proteins**

316 To facilitate host colonization, plant pathogens secrete proteins to host compartments that  
317 modulate morphological changes in the host system and establish fungal infection (68–70).  
318 Therefore, we identified the comprehensive set of secreted proteins from all *R. solani* and *T.*  
319 *calospora* genomes. Figure 4A shows the number of secreted proteins identified in each of the  
320 given genomes, wherein AG1-IC, AG3-1A1, AG6-10EEA and AG2-2IIIB contains a large  
321 number of proteins in the predicted secretome (Supplementary file, sheet 1-2). However,  
322 AG1,1C, AG2-2IIIB and AG8 contains a comparatively larger number of isolate-specific  
323 secreted proteins (i.e., secreted proteins in the unique proteome), while AG3-1AP, AG3-1A1 and  
324 AG3-PT contains comparatively lower number of secreted proteins. Interestingly, InterPro  
325 domain analysis of the secreted proteins suggests that the most enriched protein domain in the  
326 predicted secretome is “cellulose binding domain – fungal” (Figure 4B) which is essential for  
327 the fungal patho-system for the degradation of cellulose and xylans (71). In addition, the  
328 secretomes are also enriched with proteins containing “Glycoside Hydrolase Family 61”,  
329 “Pectate Lyase” and “multi-copper oxidase family” domains. Most of these protein components  
330 include enzymes essential for degradation of the plant host cell wall and breaking down the first  
331 line of host defense. We observed that certain families of protein domains are found to be  
332 enriched within a few AGs only. For instance, “aspartic peptidase family A1” domain containing  
333 proteins, involved in diverse fungal metabolic processes, are mainly enriched in AG2-2IIIB

334 isolate, similarly “lysine-specific metallo-endopeptidase” are enriched in AG3-1AP, AG5 and  
335 AG8. The AG4-R118 secretome is significantly enriched with proteins belonging to “Glycoside  
336 Hydrolase Family 28” and “Peptidase S8 propeptide-proteinase inhibitor I9” domains, whereas  
337 AG4-RS23 secretome is composed of “NodB homology” and “alpha/beta hydrolase fold-1”  
338 domains. Taken together, the analysis indicates that each of the given AG secretome is  
339 significantly enriched with a unique set of protein families that possibly allows the fungal patho-  
340 system to perform a variety of biological functions in different host systems and patho-systems.

341         Next, to identify the unique and conserved attributes associated with *R solani*, we  
342 performed a comparative analysis of the secretome with 14 other fungi (excluding *T. calospora*),  
343 which represented the major taxonomic, pathogenic, ecological, and commercially important  
344 (edible fungi) groups within the Division Basidiomycota. (Table S4). We hypothesized that small  
345 set of functionally important proteins, e.g., secreted proteins, in *R. solani* may have the unique  
346 attributes not observed within the other basidiomycetes. Therefore, we predicted the secretome  
347 and analyzed the InterPro domains in the secreted proteins of 14 different basidiomycetes and  
348 compared with the secretome of *R. solani* AGs. We observed that the number of secreted  
349 proteins predicted in *R solani* AGs are not significantly different to the number of secreted  
350 proteins in other Basidiomycetes ( $p=0.0629$ ; Figure 4C). However, the InterPro domains  
351 enriched in the secretome of *R. solani* AGs and other basidiomycetes are found to be  
352 significantly different. We observed that only a limited number of InterPro terms are shared  
353 between *R. solani* AGs and other basidiomycetes, and *R. solani* AGs are functionally closer to  
354 each other than other basidiomycetes (Figure 4D), which suggests that *R. solani* secretome have  
355 a unique domain profile, which are primarily different from other Basidiomycetes. Overall, we  
356 found 565 InterPro terms in the secretome of *R. solani*, whereas in other basidiomycetes

357 (including *T. calospora*), secretomes are enriched with 620 terms in which 283 InterPro terms  
358 are common across both the group of species. We observed 282 InterPro terms (50%) uniquely  
359 associated with *R. solani*, not observed in the secretome of other basidiomycetes, whereas 337  
360 InterPro terms are only observed in the secretome of other basidiomycetes. The analysis of *R.*  
361 *solani* specific 282 InterPro terms includes several protein domains belonging to diverse  
362 functional significance, e.g., “Aspartic peptidase A1 family”, “Cysteine rich secretory protein  
363 related” and “Polysaccharide lyase 8” domains. Among the domains commonly enriched across  
364 both *R. solani* isolates and other basidiomycetes, we calculated the fold change of difference of  
365 domain occurrence in their secretome and enumerated the proteins domains with significant  
366 differences across *R. solani* and other basidiomycetes (Supplementary file, sheet 1-2). Our  
367 analysis suggests, high differences in domains frequency wherein, protein with domains like  
368 “Pectate lyase”, “Serine amino-peptidase” and “Lysine-specific metallo-endopeptidase” are  
369 significantly enriched in *R. solani* secretome. Similarly, proteins with “Hydrophobin” and “Zinc  
370 finger ring-type” domains are majorly enriched in other basidiomycetes. We believe that such  
371 large number of unique functional domains in the secreted proteome of *R. solani* may be  
372 functionally relevant that allows these fungi to survive in diverse array of conditions, and thus  
373 should further be investigated experimentally for understanding their role in survival.

374         Although these plant pathogenic fungi secrete a large number of proteins, only a small  
375 proportion of these proteins have been implicated to be effectively associated with fungal-plant  
376 interactions, i.e. effector proteins (68–70). Effector proteins can strongly inhibit the activity of  
377 host cellular proteases and allow pathogenic fungi to evade host defense mechanisms. Fungal  
378 effector proteins are not known for having a conserved family of domains, these proteins  
379 typically are of small length (300-400 amino acids) and higher cysteine content (55, 69, 72). Our

380 analysis reveals 75-134 effector proteins predicted in *R. solani* genomes, whereas *T. calospora*  
381 contains 136 effector proteins (Figure 5A; supplementary file S1-S7).

382 Isolates from AG1-IC contains the highest number of effector proteins ( $n=134$ ), whereas  
383 isolate from AG3-PT contains a small number of effectors ( $n=75$ ). Nevertheless, all the isolates  
384 are composed of approximately 100 effector proteins which contain a similar proportion of  
385 cysteine residues in the predicted effector proteins (Figure 5B). Next, we investigated the  
386 topmost enriched domains among all *R. solani* effector proteins in which “Pectate lyase” is found  
387 to be the most enriched effector protein, followed by “thaumatin family” of domain containing  
388 proteins (Figure 5C).

389 In comparison, the analysis of effector proteins in other basidiomycetes suggests that all  
390 other basidiomycetes are enriched with similar number of effector proteins (p-value = 0.14;  
391 Figure 5C-D; supplementary file; sheet 3-4). Wherein, the effector proteins in *R solani* AGs  
392 includes the proteins belonging to 237 InterPro terms, whereas the effector proteins of other  
393 basidiomycetes (including *T. calospora*) include proteins enriched with 119 terms. We found 173  
394 terms (72%) are uniquely associated with *R solani* AGs, in which most abundant terms includes  
395 IPR001283 (Cystine rich secretory protein related). These unique effectors may play the  
396 deciding roles on host recognition and in virulence of necrotrophic *Rhizoctonia* pathogens (73,  
397 74) . Moreover, we also observed 55 InterPro terms not observed with *R solani* effector proteins,  
398 including Zinc Finger and LysM domain. We also found 64 InterPro terms commonly enriched  
399 by both the groups of effector proteins, in which “Pectate lyase” and “Glycoside hydrolase  
400 family 28” are mainly associated with *R. solani* AG subgroups effector proteins, whereas  
401 “Hydrophobin” is mainly associated with other basidiomycetes. The complete list of secretome,

402 effector proteins, the InterPro domains and associated information are available in supplementary  
403 file.

#### 404 **Carbohydrate-active enzymes**

405 CAZymes are essential for degradation of host plant cells and fungal colonization in the host,  
406 and are, thus important for fungal bioactivity (75, 76). Using CAZy (Carbohydrate Active  
407 Enzyme database) (77), which contains the classified information of enzymes involved in  
408 complex carbohydrate metabolism, we annotated and compared the distribution of CAZymes in  
409 all *R. solani* isolates. Overall, *R. solani* isolates are composed of 383-595 high confidence  
410 CAZymes, with AG3-1A1 having the largest number of CAZymes (Figure 6A). These predicted  
411 CAZymes in *R. solani* AGs are mainly distributed across 177 CAZyme families that can be  
412 broadly classified into six major classes of enzymes, i.e., Glycoside Hydrolase (GH),  
413 Polysaccharide Lyase (PL), Carbohydrate Esterase (CE), Carbohydrate-binding modules (CBM)  
414 and redox enzymes with Auxiliary Activities (AA). Our analysis reveals that GH forms the  
415 major class of CAZymes in all fungal species, including *T. calospora* (Figure S6 and S7), which  
416 hydrolyzes the glycosidic bonds between carbohydrate and non-carbohydrate moieties or  
417 between two or more carbohydrate moieties (78). Whereas CBM forms the least abundant class  
418 of enzymes enriched in the proteomes of the given isolates. Despite the differences, we observed  
419 similar distribution of enzyme count in each class of CAZyme across all the given isolates.

420 We found that among the predicted 177 families, only 34 families are abundant (with total  
421 enzyme count > 50 proteins; Figure 6B) across all the given isolates, i.e., *Rhizoctonia* species  
422 and *T. calospora*. These 36 families have a distinct abundance profile in each AG, for instance,  
423 protein from GH7 family is highly abundant in *T. calospora* as compared to the *R. solani* isolates.  
424 Similarly, proteins belonging to PL1\_4 are not observed in AG4-R118 and *T. calospora*. We

425 have divided these 34 families into three different groups, with respect to their abundance profile  
426 in *R. solani* isolates. The Group-1 contains CAZymes belonging to GH28, AA9, PL3\_2 and  
427 AA3\_2 families and form the highly abundant families (total enzyme count >200 proteins) of  
428 enzymes in *R Solani* AGs. Similarly, Group-2 contains 11 CAZyme families with enzymes  
429 moderately abundant in *R Solani* AGs. Whereas Group-3 contains 19 families with sparsely  
430 abundant CAZymes. We observed that in all the three clusters, AG3-1A1 contains the highest  
431 number of CAZymes for most the 34 families, and significantly enriched with all the members of  
432 Group-1 families. In fact, the clustering analysis highlights the similar profiles of AG3-1A1 and  
433 AG2-2IIIB, mainly due to similar distribution of proteins belonging to GH28, AA9, AA3\_2 and  
434 GH7. In Group-1, although GH28 containing enzymes are abundant in most of the *R. solani*  
435 isolates, AG8 contains limited number of enzymes belonging to this family. Similarly, AA9 and  
436 PL3\_2 families of enzymes are abundant only in 50% of the isolates, and thus may be relevant  
437 for a unique set of functions associated with the respective isolates. In Group-2, however, we  
438 observed similar distribution of abundance profile across all the isolates, except *T. calospora*,  
439 which indicates their probable role in *R. solani* specific function. For examples, CAZymes  
440 belonging to AA5\_1, GH18 and PL4\_1 are enriched in most of the *R. solani* isolates, but not in  
441 *T. calospora*. The conserved distribution of CAZymes families in the diverse proteomes of  
442 different *R. solani* isolates signifies their essential role in fungal activity. On the other hand,  
443 Group-3 CAZymes provide unique and distinct profile to each AG with a limited number of  
444 families showing similar abundance profile. Wherein, *T. calospora* is found to be distinctly  
445 abundant in CAZymes belonging to GH5\_5, not observed with *R. solani* isolates. These results  
446 strongly suggested that *R. solani* isolates share a large proportion of carbohydrate degrading  
447 enzymes, in which an isolate-specific CAZyme profile can also be observed (mainly from



448 Group-3). To confirm, if the abundance profile is strictly associated with *R. solani* isolates, we  
449 performed the comparative analysis with abundance profile of 14 other basidiomycetes. The  
450 analysis clearly reveals the distinct CAZymes profile than other Basidiomycetes, in which *R.*  
451 *solani* isolates can be phylogenetically grouped into a different cluster (Figure S8). The analysis  
452 highlights the families that uniquely abundant in *R. solani* isolates than other basidiomycetes,  
453 e.g., GH28, PL3\_2, AA5\_1, CE4, GH10, GH62, PL4\_1, CE8, PL1\_7, PL1\_4 and AA7, and as  
454 expected, most of these families belong to Group-1 and Group-2 of the previous analysis.  
455 Among these families, we observed that PL3\_2, GH62 and CE8 families of proteins are  
456 distinctly expressed in *R. solani* isolates. In addition, AG3-1A1 is exceptionally abundant in  
457 AA9 and GH28, not observed with any other basidiomycetes under investigation. In contrast,  
458 AA3\_2 (Group-1) is abundant in most of the basidiomycetes, including *R. solani*. In summary,  
459 we have shown that members of CAZymes families belonging to Group-1 and Group-2 are  
460 abundant in *R. solani* isolates and may also provide them a unique attribute (or functions) not  
461 observed with the other basidiomycetes.

#### 462 **RsolaniDB: a *Rhizoctonia solani* pangenome database and its applications**

463 RDB is a large-scale, integrative repository for hosting the *R. solani* pangenome project with  
464 emphasis on supporting data mining and analysis, wherein the genomes and their components  
465 can be accessed under three different categories, viz. genomic, ortholog and functional  
466 assignment.

467 *Genomes*: The genomic content includes draft genome sequences of *R. solani* isolates in FASTA  
468 format along with the gene level annotation in GFF3 format. The annotation includes prediction  
469 of gene boundaries with introns and exons, as well as their locations on contigs or scaffolds. It  
470 also includes the predicted transcribed cDNA sequences and translated protein sequences. This

471 information is vital for those users looking for reference genomes and their annotated  
472 components for mapping RNAseq reads. The draft genomes and their annotation can also be  
473 downloaded and used for downstream local analysis, e.g., variants calling, SNP, eQTLs analysis  
474 and other similar genomic analyses with different bioinformatics methods.

475 *Orthologs*: Using the orthoMCL clustering on the proteomes of 18 *R. solani* (including  
476 previously published genome assemblies), protein sequences were compared and clustered into  
477 groups of similar sequences. The sequences not part of any of the clusters, i.e., singletons, and  
478 unique to respective isolates were categorized as “unique”. Whereas the rest of the proteome was  
479 categorized either into “core” or “auxillary” groups of orthoMCL clusters. RDB allows users to  
480 retrieve this information for each protein entry and also allows users to retrieve the protein ID of  
481 other members of its ortholog cluster family, if any.

482 *Functional assignment*: This category includes the predicted InterPro protein domains associated  
483 with each of the protein entries. RDB also includes GO information associated with each protein,  
484 along with PANTHER pathway terms. This information helps in assigning the functional  
485 description for each protein entry in the database.

486 The database is organized to include one unique RDB ID (or entry) for each gene  
487 structure, with all of the above associated information. The RDB ID allows users to search the  
488 genomic coordinates (intron/exon boundaries) with IGV visualization, sequences and its  
489 functional annotation, for each gene in each *R. solani* isolate. All of this information can be  
490 retrieved from the database via the “text-based” or “keywords-based” search in an AG-specific  
491 manner or from the entire database. Users can also perform blast searches of their own  
492 nucleotide or protein sequences to the entire database or can target a given AG. Moreover, users  
493 can retrieve the set of sequences in FASTA format, for a given list of RDB IDs. One of the

494 important and unique features of RsolaniDB tools allows users to perform functional or gene-set  
495 enrichment analysis of given RDB IDs, e.g., Gene Ontology or pathway analysis. This feature is  
496 especially useful for analyzing differentially expressed genes after RNAseq data analysis, as it  
497 provides the statistical significance (as  $p$ -values) of different GO/pathway terms enriched in a  
498 given set of differentially expressed genes. As far as we know, this feature is unique to RDB  
499 with respect to any other existing *Rhizoctonia* resources. However, it requires the user to use  
500 reference genome sequences and the annotation file from RDB database for subjecting into  
501 RNAseq data analysis pipeline. As an additional resource, RDB also incorporated previously  
502 published (16, 18, 20, 79–81) genome and transcriptome level information in a single platform  
503 with an RDB ID format. The database is publicly available to the scientific community,  
504 accessible at <http://rsolanidb.kaust.edu.sa/RhDB/index.html>.

## 505 **Discussion**

506 *Rhizoctonia solani* is considered as one of the most destructive and a diverse group of soil-borne  
507 plant pathogens causing various diseases on a wide range of economically important crops. It is  
508 classified into 13 AGs with distinctive pathogenic host range and responsiveness to disease  
509 control measures. For example, AG1, AG2-IIIB, and AG4 cause diseases mostly on cool-  
510 season turfgrasses, whereas AG2-LP, causing large patch disease, is predominantly seen on  
511 warm season turfgrasses (82, 83). Isolates from different AGs also vary in sensitivity to  
512 fungicides and no single fungicide is effective against all AGs (84). For example, AG5 isolates  
513 are moderately sensitive to pencycuron, while other AGs are highly sensitive to this fungicide  
514 (85). Our ability to control this pathogen is hampered by a lack of accurate molecular  
515 identification of AGs and its subgroups, and poor understanding of the genetic variation among

516 them. This genetic variation results in differing sensitivity to control measures, as well as the  
517 pathogenic and ecological diversity in the population structures of the *R. solani* complex.  
518 One of the primary reasons for this limited understanding of the *R. solani* complex is the lack of  
519 genetic studies representative of its heterozygous and diverse AGs and sub-groups (13). Until  
520 now, draft genome assemblies belonging to only four of the 13 AGs had been reported; viz.  
521 AG1-IA (16), AG1-IB (17), AG2-2IIIB (13), AG3-Rhs1AP (18), AG3-PT isolate Ben-3 (19) and  
522 AG8 (20). Here we expanded the scope of genetic analysis of the *R. solani* complex by  
523 performing comprehensive genome sequencing, assembly, annotation and comparative analysis  
524 of 12 *R. solani* isolates. This enabled us to perform pangenome analysis of *R. solani* to 7 AGs  
525 (AG1, AG2, AG3, AG4, AG5, AG6, AG8), selected additional sub-groups (AG1-IC, AG3-TB),  
526 and a hypovirulent isolate (AG3-1A1). Although heterokarotic and diploid nature of *Rhizoctonia*  
527 species are expected to cause the genome assembly challenges (13), in our analysis we observed  
528 of a large number of inter-groups syntenic regions and ITS2-based similarities which highlights  
529 the high similarities among the given 13 *R. solani* isolates (including AG3-PT). The recognition  
530 of conserved ITS2 sequences along with large syntenic regions despite the physiological and  
531 taxonomic differences in the given isolates suggests the essentially conserved regions and high  
532 quality of the draft genome sequences generated in this study.

533         Subsequently, to deduce the similarities as well as unique features in the given set of  
534 predicted proteomes, we performed a series of comparative analyses that indicated the expected  
535 heterogeneity among *R. solani* subgroups with the orchid mycorrhizal fungus *T. calospora* as an  
536 outlier. For example, both AG5 and AG2-2IIIB included a large set of unique proteomes as well  
537 as secretomes, enriched with InterPro families of proteins that are abundant in these two AGs.  
538 Additionally, the proteome of *R. solani* isolates are uniquely and highly enriched with proteins

539 with “pectate lyase” domains, as compared to the other basidiomycetes. Another finding of  
540 potential significance is that the highest number of orthoMCL clusters were shared between  
541 AG3-1A1 and AG3-1AP, both isolates belonging to the AG3-PT subgroup. Isolate AG3-1A1 is  
542 the sector-derived, hypovirulent isolate of the more virulent isolate, AG3-1AP. Intriguingly,  
543 AG3-1A1 has been demonstrated to be a successful biocontrol agent of isolate AG3-1AP in the  
544 field (86). Competitive niche exclusion is a demonstrated mechanism for biocontrol where the  
545 biocontrol agent has a significant overlap in resource utilization with the pathogen and  
546 outcompetes the pathogen for these necessary resources (87). A high degree of overlap in gene  
547 function is consistent with the mechanism of biocontrol of AG3-1AP in the field by AG3-1A1  
548 through competitive niche exclusion.

549 The sector-derived, hypovirulent isolate AG3-1A1 however differed from the progenitor isolate  
550 AG3-1AP, as well as the other *R. solani* isolates analyzed, in AROM sequences. AROM  
551 sequences are known for their conserved profile across fungal species and encode the penta-  
552 functional AROM polypeptide that catalyzes five consecutive enzymatic reactions in the  
553 prechorismate steps of the shikimate pathway; leading to biosynthesis of the aromatic amino  
554 acids tryptophan, tyrosine, and phenylalanine(65). The isolate AG3-1A1 contained two complete  
555 penta-functional AROM protein sequences while other isolates contained only one complete  
556 sequence or partial AROM sequences. Sectoring as a means of phenotypic plasticity in fungi  
557 may take place by genetic mutations, rearrangement of heterokaryotic nuclei, conversion from  
558 heterokaryotic to homokaryotic mycelium, exchange of cytoplasmic factors, etc., resulting in  
559 changes in morphology, virulence, mating type, sporulation, and ecological adaptations (88). It is  
560 possible that the genetic event that led to duplication of the AROM sequences in AG3-1A1 led to  
561 hypovirulence. Phenylacetic acid (PAA) has been demonstrated to be a virulence factor in the

562 progenitor isolate, AG3-1AP, and that downregulation of the shikimate pathway occurs in AG3-  
563 1A1; resulting in a reduction in production of PAA by AG3-1A1(89). Moreover, possibilities  
564 exist that one of the two *arom* genes in AG3-1A1 remains inactive due to methylation, or that the  
565 gene duplication is an attempt to compensate for the suppressed shikimate pathway as  
566 documented in *Aspergillus nidulans* (65). However, further investigation is necessary to  
567 determine if any of those hypotheses is true.

568         Secretome analysis also revealed several interesting findings that provided unique  
569 characteristics to each *R. solani* isolate, e.g., secretome of AG1-1B and AG3-T5 are uniquely  
570 and significantly enriched with three different multi-copper oxidases (type 1/2/3), both of which  
571 are known to cause foliar diseases. Nevertheless, despite the differences, most of the secretome  
572 have similar composition in their significantly enriched protein domains, which mainly includes  
573 "Cellulose-binding domain fungal", "Glycoside hydrolase family 61" and "Pectate lyase".  
574 However, the composition is significantly different with respect to the other basidiomycetes and  
575 large number of reported protein families are uniquely associated with multiple *R. solani*  
576 isolates. We observed similar finding for the effector proteins, wherein protein containing  
577 "Cysteine rich secretory proteins", "Pectate lyase" and "Thaumatococcus" are distinctly abundant in *R.*  
578 *solani* isolates, whereas "Hydrophobin" is only abundant in other basidiomycetes. Similarly, the  
579 CAZyme analysis highlighted several unique attributes associated with each *R. solani* species  
580 especially AG3-1A1 by possessing the CBM1 family of proteins which are linked with  
581 degradation of insoluble polysaccharides (90). It was observed that several families of these  
582 CAZymes were not present in *T. calospora* which is a symbiotic mycorrhizal fungus and other  
583 basidiomycetes, e.g. GH28, PL3\_2, AA5\_1 and GH10 (91). Overall, data presented in this study  
584 are consistent with the hypothesis that AG and sub-groups of *Rhizoctonia* species are highly

585 heterogeneous, each with unique functional genomic properties, while being conserved in their  
586 functional regions with respective other groups. However, the unique secretomes, effector and  
587 similarly CAZymes profiles of *R. solani* over other basidiomycetes may reflect the ecological  
588 and host adaptation strategies, as well as the necrotrophic lifestyle of the former, and call for  
589 future research in respective areas to better understand the biology and pathology of the species.

590 To further propel research with *R. solani* we present our data as the web-resource  
591 RsolaniDB (RDB). This web-resource includes detailed information on each *R. solani* isolate,  
592 such as the genome properties, predicted transcript/protein sequences, predicted function, and  
593 protein orthologues among other AG sub-groups, along with tools for Gene Ontology (GO) and  
594 pathway enrichment analysis, orthologs, sequence analysis and IGV visualization of gene  
595 models. Also, by adding the previously published genome assemblies and their features,  
596 RsolaniDB stands as the universal platform for accessing *R. solani* resources with single  
597 identifier format. Since none of the existing Rhizoctonia specific databases host such a large  
598 repertoire of genome assemblies and accessory web-tools for functional enrichment analysis of  
599 gene set, e.g., differentially expressed genes, RsolaniDB stands as a valuable resource for  
600 formulating new hypotheses and understanding the unique or conserved patho-system of *R.*  
601 *solani* AGs and subgroups. The associated gene-set enrichment analysis tool further sets  
602 RsolaniDB apart from the existing fungal databases which does not allow the gene enrichment  
603 analysis.

604 Finally, since, each of the *R. solani* AGs or subgroups is characterized by a unique  
605 heterogeneous profile, we strongly believe that the presented genome assemblies, annotation and  
606 comparative analysis will facilitate mycologists and plant pathologists generating a greater  
607 understanding of its biology and ecology, and in developing as well as improving the existing *R.*

608 *solani* disease management projects, including drug target discovery and design of future  
609 diagnostic tools for rapid discrimination of *R. solani* AGs under indoor and outdoor farming  
610 environments.

#### 611 **Data availability**

612 All data is publicly available as the error corrected, processed fastq files at European Nucleotide  
613 Archive (ENA) at EMBL-EBI under primary accession ID PRJEB39881 (secondary accession:  
614 ERP123449) (92, 93). Genome assemblies and corresponding annotations are available at  
615 RsolaniDB database (<http://rsolanidb.kaust.edu.sa/RhDB/index.html>)

#### 616 **Funding**

617 This project was funded by USDA-ARS fund [Agreement #-58-8042-8-067-F USDA-KAUST  
618 project] to DKL and a KAUST faculty baseline fund [BAS/1/1020-01-01] to AP.

#### 619 **Acknowledgements**

620 The authors thank the members of the Bioscience Core Laboratory (BCL) in KAUST for  
621 producing the raw DNA and RNA sequence datasets and Adnan (Ed) Ismaiel (USDA-ARS,  
622 SASL, for DNA extraction and fungal culture maintenance). We also thank Drs. Ian Misner and  
623 Nadim Alkharouf (Towson University, Towson, MD.) for helping during the initial setting-up of  
624 the project.

#### 625 **Author contributions**

626 A.K., D.K.L. and A.P. conceived the study, interpreted the results and wrote the manuscript;  
627 A.K. performed the bioinformatics analysis and developed the computational pipelines and the  
628 database; A.R., S.M. and M.N. conducted the molecular experiments, library preparation and



629 sequencing; D.P.R. collected and stored the materials and edited the manuscript; A.P. and D.K.L.  
630 supervised the overall project.

## 631 **References**

- 632 1. Yang,G. and Li,C. (2012) General Description of Rhizoctonia Species Complex INTECH  
633 Open Access Publisher.
- 634 2. Amaradasa,B.S., Horvath,B.J., Lakshman,D.K. and Warnke,S.E. (2013) DNA fingerprinting  
635 and anastomosis grouping reveal similar genetic diversity in rhizoctonia species infecting  
636 turfgrasses in the transition zone of USA. *Mycologia*, **105**, 1190–1201.
- 637 3. Raaijmakers,J.M., Paulitz,T.C., Steinberg,C., Alabouvette,C. and Moënné-Loccozy,Y. (2009)  
638 The rhizosphere: A playground and battlefield for soilborne pathogens and beneficial  
639 microorganisms. *Plant Soil*, **321**, 341–361.
- 640 4. González,D., Rodríguez-Carres,M., Boekhout,T., Stalpers,J., Kuramae,E.E., Nakatani,A.K.,  
641 Vilgalys,R. and Cubeta,M.A. (2016) Phylogenetic relationships of Rhizoctonia fungi within  
642 the Cantharellales. *Fungal Biol.*, **120**, 603–619.
- 643 5. Keijer,J., Korsman,M.G., Dullemans,A.M., Houterman,P.M., De Bree,J. and Van  
644 Silfhout,C.H. (1997) In vitro analysis of host plant specificity in Rhizoctonia solani. *Plant*  
645 *Pathol.*, **46**, 659–669.
- 646 6. Foley,R.C., Gleason,C.A., Anderson,J.P., Hamann,T. and Singh,K.B. (2013) Genetic and  
647 Genomic Analysis of Rhizoctonia solani Interactions with Arabidopsis; Evidence of  
648 Resistance Mediated through NADPH Oxidases. *PLoS One*, **8**, e56814.
- 649 7. Gonzalez,D., Carling,D.E., Kuninaga,S., Vilgalys,R. and Cubeta,M.A. (2001) Ribosomal  
650 DNA systematics of Ceratobasidium and Thanatephorus with Rhizoctonia anamorphs .  
651 *Mycologia*, **93**, 1138–1150.
- 652 8. Hane,J.K., Anderson,J.P., Williams,A.H., Sperschneider,J. and Singh,K.B. (2014) Genome  
653 sequencing and comparative genomics of the broad host-range pathogen Rhizoctonia solani  
654 AG8. *PLoS Genet.*, **10**, e1004281.
- 655 9. Hossain,M.K., Tze,O.S., Nadarajah,K., Jena,K., Bhuiyan,M.A.R. and Ratnam,W. (2014)  
656 Identification and validation of sheath blight resistance in rice (*Oryza sativa* L.) cultivars  
657 against Rhizoctonia solani. *Can. J. Plant Pathol.*, **36**, 482–490.
- 658 10. Copley,T., Bayen,S. and Jabaji,S. (2017) Biochar Amendment Modifies Expression of

- 659 Soybean and *Rhizoctonia solani* Genes Leading to Increased Severity of *Rhizoctonia* Foliar  
660 Blight. *Front. Plant Sci.*, **8**, 221.
- 661 11. Anderson,J.P., Hane,J.K., Stoll,T., Pain,N., Hastie,M.L., Kaur,P., Hoogland,C., Gorman,J.J.  
662 and Singh,K.B. (2016) Proteomic analysis of *rhizoctonia solani* identifies infection-specific,  
663 redox associated proteins and insight into adaptation to different plant hosts. *Mol. Cell.*  
664 *Proteomics*, **15**, 1188–1203.
- 665 12. Lakshman,D.K., Roberts,D.P., Garrett,W.M., Natarajan,S.S., Darwish,O., Alkharouf,N.,  
666 Pain,A., Khan,F., Jambhulkar,P.P. and Mitra,A. (2016) Proteomic Investigation of  
667 *Rhizoctonia solani* AG 4 Identifies Secretome and Mycelial Proteins with Roles in Plant  
668 Cell Wall Degradation and Virulence. *J. Agric. Food Chem.*, **64**, 3101–3110.
- 669 13. Wibberg,D., Andersson,L., Tzelepis,G., Rupp,O., Blom,J., Jelonek,L., Pühler,A.,  
670 Fogelqvist,J., Varrelmann,M., Schlüter,A., *et al.* (2016) Genome analysis of the sugar beet  
671 pathogen *Rhizoctonia solani* AG2-2IIIB revealed high numbers in secreted proteins and cell  
672 wall degrading enzymes. *BMC Genomics*, **17**, 245.
- 673 14. Zhang,J., Chen,L., Fu,C., Wang,L., Liu,H., Cheng,Y., Li,S., Deng,Q., Wang,S., Zhu,J., *et al.*  
674 (2017) Comparative transcriptome analyses of gene expression changes triggered by  
675 *Rhizoctonia solani* AG1 IA infection in resistant and susceptible rice varieties. *Front. Plant*  
676 *Sci.*, **8**, 1422.
- 677 15. Shu,C., Zhao,M., Anderson,J.P., Garg,G., Singh,K.B., Zheng,W., Wang,C., Yang,M. and  
678 Zhou,E. (2019) Transcriptome analysis reveals molecular mechanisms of sclerotial  
679 development in the rice sheath blight pathogen *Rhizoctonia solani* AG1-IA. *Funct. Integr.*  
680 *Genomics*, **19**, 743–758.
- 681 16. Nadarajah,K., Razali,N.M., Cheah,B.H., Sahrana,N.S., Ismail,I., Tathode,M. and Bankar,K.  
682 (2017) Draft genome sequence of *Rhizoctonia solani* anastomosis group 1 subgroup 1A  
683 strain 1802/KB isolated from rice. *Genome Announc.*, **5**.
- 684 17. Wibberg,D., Rupp,O., Blom,J., Jelonek,L., Kröber,M., Verwaaijen,B., Goesmann,A.,  
685 Albaum,S., Grosch,R., Pühler,A., *et al.* (2015) Development of a *Rhizoctonia solani* AG1-  
686 IB Specific Gene Model Enables Comparative Genome Analyses between Phytopathogenic  
687 *R. solani* AG1-IA, AG1-IB, AG3 and AG8 Isolates. *PLoS One*, **10**.
- 688 18. Cubeta,M.A., Thomas,E., Dean,R.A., Jabaji,S., Neate,S.M., Tavantzis,S., Toda,T.,  
689 Vilgalys,R., Bharathan,N., Fedorova-Abrams,N., *et al.* (2014) Draft Genome Sequence of

- 690 the Plant-Pathogenic Soil Fungus *Rhizoctonia solani* Anastomosis Group 3 Strain Rhs1AP.  
691 *Genome Announc.*, **2**.
- 692 19. Wibberg,D., Genzel,F., Verwaaijen,B., Blom,J., Rupp,O., Goesmann,A., Zrenner,R.,  
693 Grosch,R., Pühler,A. and Schlüter,A. (2017) Draft genome sequence of the potato pathogen  
694 *Rhizoctonia solani* AG3-PT isolate Ben3. *Arch. Microbiol.*, **199**, 1065–1068.
- 695 20. Hane,J.K., Anderson,J.P., Williams,A.H., Sperschneider,J. and Singh,K.B. (2014) Genome  
696 Sequencing and Comparative Genomics of the Broad Host-Range Pathogen *Rhizoctonia*  
697 *solani* AG8. *PLoS Genet.*, **10**.
- 698 21. Bills,G.F., Singleton,L.L., Mihail,J.D. and Rush,C.M. (1993) Methods for Research on  
699 Soilborne Phytopathogenic Fungi The American Phytopathological Society,.
- 700 22. Carlson,J.E., Tulsieram,L.K., Glaubitz,J.C., Luk,V.W.K., Kauffeldt,C. and Rutledge,R.  
701 (1991) Segregation of random amplified DNA markers in F1 progeny of conifers. *Theor.*  
702 *Appl. Genet.*, 10.1007/BF00226251.
- 703 23. Sayers,E.W., Beck,J., Brister,J.R., Bolton,E.E., Canese,K., Comeau,D.C., Funk,K., Ketter,A.,  
704 Kim,S., Kimchi,A., *et al.* (2020) Database resources of the National Center for  
705 Biotechnology Information. *Nucleic Acids Res.*, 10.1093/nar/gkz899.
- 706 24. Bolger,A.M., Lohse,M. and Usadel,B. (2014) Trimmomatic: A flexible trimmer for Illumina  
707 sequence data. *Bioinformatics*, **30**, 2114–2120.
- 708 25. Simon Andrews (2020) Babraham Bioinformatics - FastQC A Quality Control tool for High  
709 Throughput Sequence Data. *Soil*, **5**, 47–81.
- 710 26. Marçais,G. and Kingsford,C. (2011) A fast, lock-free approach for efficient parallel counting  
711 of occurrences of k-mers. *Bioinformatics*, **27**, 764–770.
- 712 27. Grabherr,M.G., Haas,B.J., Yassour,M., Levin,J.Z., Thompson,D.A., Amit,I., Adiconis,X.,  
713 Fan,L., Raychowdhury,R., Zeng,Q., *et al.* (2011) Full-length transcriptome assembly from  
714 RNA-Seq data without a reference genome. *Nat. Biotechnol.*, **29**, 644–652.
- 715 28. Bankevich,A., Nurk,S., Antipov,D., Gurevich,A.A., Dvorkin,M., Kulikov,A.S., Lesin,V.M.,  
716 Nikolenko,S.I., Pham,S., Prjibelski,A.D., *et al.* (2012) SPAdes: A new genome assembly  
717 algorithm and its applications to single-cell sequencing. *J. Comput. Biol.*, **19**, 455–477.
- 718 29. Gurevich,A., Saveliev,V., Vyahhi,N. and Tesler,G. (2013) QUAST: Quality assessment tool  
719 for genome assemblies. *Bioinformatics*, **29**, 1072–1075.
- 720 30. Boetzer,M., Henkel,C. V., Jansen,H.J., Butler,D. and Pirovano,W. (2011) Scaffolding pre-

- 721 assembled contigs using SSPACE. *Bioinformatics*, 10.1093/bioinformatics/btq683.
- 722 31. Luo,R., Liu,B., Xie,Y., Li,Z., Huang,W., Yuan,J., He,G., Chen,Y., Pan,Q., Liu,Y., *et al.*  
723 (2012) SOAPdenovo2: An empirically improved memory-efficient short-read de novo  
724 assembler. *Gigascience*, **1**, 18.
- 725 32. Song,L., Shankar,D.S. and Florea,L. (2016) Rascaf: Improving Genome Assembly with RNA  
726 Sequencing Data. *Plant Genome*, **9**, plantgenome2016.03.0027.
- 727 33. Seppey,M., Manni,M. and Zdobnov,E.M. (2019) BUSCO: Assessing genome assembly and  
728 annotation completeness. In *Methods in Molecular Biology*. Humana Press Inc., Vol. 1962,  
729 pp. 227–245.
- 730 34. Bengtsson-Palme,J., Ryberg,M., Hartmann,M., Branco,S., Wang,Z., Godhe,A., De Wit,P.,  
731 Sánchez-García,M., Ebersberger,I., de Sousa,F., *et al.* (2013) Improved software detection  
732 and extraction of ITS1 and ITS2 from ribosomal ITS sequences of fungi and other  
733 eukaryotes for analysis of environmental sequencing data. *Methods Ecol. Evol.*, **4**, 914–919.
- 734 35. Kumar,S., Stecher,G., Li,M., Knyaz,C. and Tamura,K. (2018) MEGA X: Molecular  
735 evolutionary genetics analysis across computing platforms. *Mol. Biol. Evol.*,  
736 10.1093/molbev/msy096.
- 737 36. Rédei,G.P. (2008) CLUSTAL W (improving the sensitivity of progressive multiple sequence  
738 alignment through sequence weighting, position-specific gap penalties and weight matrix  
739 choice). In *Encyclopedia of Genetics, Genomics, Proteomics and Informatics*.
- 740 37. Jovanovic,N. and Mikheyev,A.S. (2019) Interactive web-based visualization and sharing of  
741 phylogenetic trees using phylogeny.IO. *Nucleic Acids Res.*, **47**, W266–W269.
- 742 38. Huerta-Cepas,J., Serra,F. and Bork,P. (2016) ETE 3: Reconstruction, Analysis, and  
743 Visualization of Phylogenomic Data. *Mol. Biol. Evol.*, **33**, 1635–1638.
- 744 39. Prysycz,L.P. and Gabaldón,T. (2016) Redundans: An assembly pipeline for highly  
745 heterozygous genomes. *Nucleic Acids Res.*, **44**, e113.
- 746 40. Camacho,C., Coulouris,G., Avagyan,V., Ma,N., Papadopoulos,J., Bealer,K. and  
747 Madden,T.L. (2009) BLAST+: Architecture and applications. *BMC Bioinformatics*, **10**,  
748 421.
- 749 41. Cantarel,B.L., Korf,I., Robb,S.M.C., Parra,G., Ross,E., Moore,B., Holt,C., Alvarado,A.S.  
750 and Yandell,M. (2008) MAKER: An easy-to-use annotation pipeline designed for emerging  
751 model organism genomes. *Genome Res.*, **18**, 188–196.

- 752 42. Tarailo-Graovac, M. and Chen, N. (2009) Using RepeatMasker to identify repetitive elements  
753 in genomic sequences. *Curr. Protoc. Bioinforma.*, 10.1002/0471250953.bi0410s25.
- 754 43. Bateman, A., Martin, M.J., O'Donovan, C., Magrane, M., Alpi, E., Antunes, R., Bely, B.,  
755 Bingley, M., Bonilla, C., Britto, R., *et al.* (2017) UniProt: The universal protein  
756 knowledgebase. *Nucleic Acids Res.*, 10.1093/nar/gkw1099.
- 757 44. Mi, H. and Thomas, P. (2009) PANTHER pathway: an ontology-based pathway database  
758 coupled with data analysis tools. *Methods Mol. Biol.*, **563**, 123–140.
- 759 45. Ashburner, M., Ball, C.A., Blake, J.A., Botstein, D., Butler, H., Cherry, J.M., Davis, A.P.,  
760 Dolinski, K., Dwight, S.S., Eppig, J.T., *et al.* (2000) Gene ontology: Tool for the unification  
761 of biology. *Nat. Genet.*, **25**, 25–29.
- 762 46. Quevillon, E., Silventoinen, V., Pillai, S., Harte, N., Mulder, N., Apweiler, R. and Lopez, R.  
763 (2005) InterProScan: Protein domains identifier. *Nucleic Acids Res.*, **33**.
- 764 47. Hulo, N. (2004) Recent improvements to the PROSITE database. *Nucleic Acids Res.*,  
765 10.1093/nar/gkh044.
- 766 48. Marchler-Bauer, A., Zheng, C., Chitsaz, F., Derbyshire, M.K., Geer, L.Y., Geer, R.C.,  
767 Gonzales, N.R., Gwadz, M., Hurwitz, D.I., Lanczycki, C.J., *et al.* (2013) CDD: Conserved  
768 domains and protein three-dimensional structure. *Nucleic Acids Res.*, 10.1093/nar/gks1243.
- 769 49. Finn, R.D., Bateman, A., Clements, J., Coggill, P., Eberhardt, R.Y., Eddy, S.R., Heger, A.,  
770 Hetherington, K., Holm, L., Mistry, J., *et al.* (2014) Pfam: The protein families database.  
771 *Nucleic Acids Res.*, 10.1093/nar/gkt1223.
- 772 50. Haft, D.H., Selengut, J.D. and White, O. (2003) The TIGRFAMs database of protein families.  
773 *Nucleic Acids Res.*, 10.1093/nar/gkg128.
- 774 51. Potter, S.C., Luciani, A., Eddy, S.R., Park, Y., Lopez, R. and Finn, R.D. (2018) HMMER web  
775 server: 2018 update. *Nucleic Acids Res.*, **46**, W200–W204.
- 776 52. Almagro Armenteros, J.J., Tsirigos, K.D., Sønderby, C.K., Petersen, T.N., Winther, O.,  
777 Brunak, S., von Heijne, G. and Nielsen, H. (2019) SignalP 5.0 improves signal peptide  
778 predictions using deep neural networks. *Nat. Biotechnol.*, **37**, 420–423.
- 779 53. Käll, L., Krogh, A. and Sonnhammer, E.L.L. (2007) Advantages of combined transmembrane  
780 topology and signal peptide prediction—the Phobius web server. *Nucleic Acids Res.*, **35**.
- 781 54. Emanuelsson, O., Brunak, S., von Heijne, G. and Nielsen, H. (2007) Locating proteins in the  
782 cell using TargetP, SignalP and related tools. *Nat. Protoc.*, **2**, 953–971.

- 783 55. Sperschneider,J., Gardiner,D.M., Dodds,P.N., Tini,F., Covarelli,L., Singh,K.B.,  
784 Manners,J.M. and Taylor,J.M. (2016) EffectorP: Predicting fungal effector proteins from  
785 secretomes using machine learning. *New Phytol.*, **210**, 743–761.
- 786 56. Zhang,H., Yohe,T., Huang,L., Entwistle,S., Wu,P., Yang,Z., Busk,P.K., Xu,Y. and Yin,Y.  
787 (2018) DbCAN2: A meta server for automated carbohydrate-active enzyme annotation.  
788 *Nucleic Acids Res.*, **46**, W95–W101.
- 789 57. Farrer,R.A. (2017) Synima: A Synteny imaging tool for annotated genome assemblies. *BMC*  
790 *Bioinformatics*, **18**, 507.
- 791 58. Li,L., Stoeckert,C.J. and Roos,D.S. (2003) OrthoMCL: Identification of ortholog groups for  
792 eukaryotic genomes. *Genome Res.*, **13**, 2178–2189.
- 793 59. Yu,Y., Ouyang,Y. and Yao,W. (2018) ShinyCircos: An R/Shiny application for interactive  
794 creation of Circos plot. *Bioinformatics*, 10.1093/bioinformatics/btx763.
- 795 60. Krzywinski,M., Schein,J., Birol,I., Connors,J., Gascoyne,R., Horsman,D., Jones,S.J. and  
796 Marra,M.A. (2009) Circos: An information aesthetic for comparative genomics. *Genome*  
797 *Res.*, 10.1101/gr.092759.109.
- 798 61. Alexa,A. and Rahnenführer,J. (2009) Gene set enrichment analysis with topGO.  
799 *Bioconductor Improv*, **27**.
- 800 62. Marçais,G., Delcher,A.L., Phillippy,A.M., Coston,R., Salzberg,S.L. and Zimin,A. (2018)  
801 MUMmer4: A fast and versatile genome alignment system. *PLoS Comput. Biol.*, **14**.
- 802 63. Cubeta,M.A., Thomas,E., Dean,R.A., Jabaji,S., Neate,S.M., Tavantzis,S., Toda,T.,  
803 Vilgalys,R., Bharathan,N., Fedorova-Abrams,N., *et al.* (2014) Draft genome sequence of  
804 the plant-pathogenic soil fungus *Rhizoctonia solani* anastomosis group 3 strain Rhs1AP.  
805 *Genome Announc.*, 10.1128/genomeA.01072-14.
- 806 64. Lakshman,D.K., Liu,C., Mishra,P.K. and Tavantzis,S. (2006) Characterization of the *arom*  
807 gene in *Rhizoctonia solani*, and transcription patterns under stable and induced  
808 hypovirulence conditions. *Curr. Genet.*, 10.1007/s00294-005-0005-6.
- 809 65. Lamb,H.K., Van Den Hombergh,J.P.T.W., Newton,G.H., Moore,J.D., Roberts,C.F. and  
810 Hawkins,A.R. (1992) Differential flux through the quinate and shikimate pathways:  
811 Implications for the channelling hypothesis. *Biochem. J.*, 10.1042/bj2840181.
- 812 66. Lakshman,D.K., Jian,J. and Tavantzis,S.M. (1998) A double-stranded RNA element from a  
813 hypovirulent strain of *Rhizoctonia solani* occurs in DNA form and is genetically related to



- 814 the pentafunctional AROM protein of the shikimate pathway. *Proc. Natl. Acad. Sci. U. S.*  
815 *A.*, **95**, 6425–6429.
- 816 67. Črešnar, B. and Petrič, Š. (2011) Cytochrome P450 enzymes in the fungal kingdom. *Biochim.*  
817 *Biophys. Acta - Proteins Proteomics*, 10.1016/j.bbapap.2010.06.020.
- 818 68. Kim, K.T., Jeon, J., Choi, J., Cheong, K., Song, H., Choi, G., Kang, S. and Lee, Y.H. (2016)  
819 Kingdom-wide analysis of fungal small secreted proteins (SSPs) reveals their potential role  
820 in host association. *Front. Plant Sci.*, **7**.
- 821 69. McCotter, S.W., Horianopoulos, L.C. and Kronstad, J.W. (2016) Regulation of the fungal  
822 secretome. *Curr. Genet.*, **62**, 533–545.
- 823 70. Li, T., Wu, Y., Wang, Y., Gao, H., Gupta, V.K., Duan, X., Qu, H. and Jiang, Y. (2019) Secretome  
824 profiling reveals virulence-associated proteins of *Fusarium proliferatum* during interaction  
825 with banana fruit. *Biomolecules*, **9**.
- 826 71. Linder, M., Lindeberg, G., Reinikainen, T., Teeri, T.T. and Pettersson, G. (1995) The difference  
827 in affinity between two fungal cellulose-binding domains is dominated by a single amino  
828 acid substitution. *FEBS Lett.*, 10.1016/0014-5793(95)00961-8.
- 829 72. Stergiopoulos, I. and de Wit, P.J.G.M. (2009) Fungal Effector Proteins. *Annu. Rev.*  
830 *Phytopathol.*, **47**, 233–263.
- 831 73. Wei, M., Wang, A., Liu, Y., Ma, L., Niu, X. and Zheng, A. (2020) Identification of the Novel  
832 Effector RsIA\_NP8 in *Rhizoctonia solani* AG1 IA That Induces Cell Death and Triggers  
833 Defense Responses in Non-Host Plants. *Front. Microbiol.*, 10.3389/fmicb.2020.01115.
- 834 74. Yamamoto, N., Wang, Y., Lin, R., Liang, Y., Liu, Y., Zhu, J., Wang, L., Wang, S., Liu, H.,  
835 Deng, Q., *et al.* (2019) Integrative transcriptome analysis discloses the molecular basis of a  
836 heterogeneous fungal phytopathogen complex, *Rhizoctonia solani* AG-1 subgroups. *Sci.*  
837 *Rep.*, **9**.
- 838 75. Kameshwar, A.K.S., Ramos, L.P. and Qin, W. (2019) CAZymes-based ranking of fungi  
839 (CBRF): an interactive web database for identifying fungi with extrinsic plant biomass  
840 degrading abilities. *Bioresour. Bioprocess.*, 10.1186/s40643-019-0286-0.
- 841 76. Barrett, K., Jensen, K., Meyer, A.S., Frisvad, J.C. and Lange, L. (2020) Fungal secretome  
842 profile categorization of CAZymes by function and family corresponds to fungal phylogeny  
843 and taxonomy: Example *Aspergillus* and *Penicillium*. *Sci. Rep.*, 10.1038/s41598-020-  
844 61907-1.

- 845 77. Lombard,V., Golaconda Ramulu,H., Drula,E., Coutinho,P.M. and Henrissat,B. (2014) The  
846 carbohydrate-active enzymes database (CAZy) in 2013. *Nucleic Acids Res.*,  
847 10.1093/nar/gkt1178.
- 848 78. Henrissat,B. (1991) A classification of glycosyl hydrolases based on amino acid sequence  
849 similarities. *Biochem. J.*, 10.1042/bj2800309.
- 850 79. Wibberg,D., Genzel,F., Verwaaijen,B., Blom,J., Rupp,O., Goesmann,A., Zrenner,R.,  
851 Grosch,R., Pühler,A. and Schlüter,A. (2017) Draft genome sequence of the potato pathogen  
852 *Rhizoctonia solani* AG3-PT isolate Ben3. *Arch. Microbiol.*, **199**, 1065–1068.
- 853 80. Wibberg,D., Andersson,L., Rupp,O., Goesmann,A., Pühler,A., Varrelmann,M., Dixelius,C.  
854 and Schlüter,A. (2016) Draft genome sequence of the sugar beet pathogen *Rhizoctonia*  
855 *solani* AG2-IIIB strain BBA69670. *J. Biotechnol.*, 10.1016/j.jbiotec.2016.02.001.
- 856 81. Wibberg,D., Rupp,O., Jelonek,L., Kröber,M., Verwaaijen,B., Blom,J., Winkler,A.,  
857 Goesmann,A., Grosch,R., Pühler,A., *et al.* (2015) Improved genome sequence of the  
858 phytopathogenic fungus *Rhizoctonia solani* AG1-IB 7/3/14 as established by deep mate-pair  
859 sequencing on the MiSeq (Illumina) system. *J. Biotechnol.*, 10.1016/j.jbiotec.2015.03.005.
- 860 82. Richard W. Smiley, Peter H. Dernoeden, and B.B.C. (2005) Compendium of Turfgrass  
861 Diseases, Third Edition.
- 862 83. Burpee,L.L. and Martin,S.B. (1996) Biology of Turfgrass Diseases Incited by *Rhizoctonia*  
863 Species. In *Rhizoctonia Species: Taxonomy, Molecular Biology, Ecology, Pathology and*  
864 *Disease Control*.
- 865 84. Amaradasa,B.S., Lakshman,D., Mccall,D.S. and Horvath,B.J. (2014) In Vitro Fungicide  
866 Sensitivity of *Rhizoctonia* and *Waitea* Isolates Collected from Turfgrasses 1.
- 867 85. Champion,C., Chatot,C., Perraton,B. and Andrivon,D. (2003) Anastomosis groups,  
868 pathogenicity and sensitivity to fungicides of *Rhizoctonia solani* isolates collected on potato  
869 crops in France. *Eur. J. Plant Pathol.*, 10.1023/B:EJPP.0000003829.83671.8f.
- 870 86. Bernard,E., Larkin,R.P., Tavantzis,S., Erich,M.S., Alyokhin,A., Sewell,G., Lannan,A. and  
871 Gross,S.D. (2012) Compost, rapeseed rotation, and biocontrol agents significantly impact  
872 soil microbial communities in organic and conventional potato production systems. *Appl.*  
873 *Soil Ecol.*, 10.1016/j.apsoil.2011.10.002.
- 874 87. Roberts,D.P. and Kobayashi,D.Y. (2011) Impact of Spatial Heterogeneity Within  
875 Spermosphere and Rhizosphere Environments on Performance of Bacterial Biological



- 876 Control Agents. In *Bacteria in Agrobiolgy: Crop Ecosystems*.
- 877 88. Roper, M., Simonin, A., Hickey, P.C., Leeder, A. and Glass, N.L. (2013) Nuclear dynamics in a  
878 fungal chimera. *Proc. Natl. Acad. Sci. U. S. A.*, 10.1073/pnas.1220842110.
- 879 89. Liu, C., Lakshman, D.K. and Tavantzis, S.M. (2003) Quinic acid induces hypovirulence and  
880 expression of a hypovirulence-associated double-stranded RNA in *Rhizoctonia solani*. *Curr.*  
881 *Genet.*, 10.1007/s00294-003-0375-6.
- 882 90. Van Bueren, A.L., Morland, C., Gilbert, H.J. and Boraston, A.B. (2005) Family 6 carbohydrate  
883 binding modules recognize the non-reducing end of  $\beta$ -1,3-linked glucans by presenting a  
884 unique ligand binding surface. *J. Biol. Chem.*, 10.1074/jbc.M410113200.
- 885 91. Fochi, V., Chitarra, W., Kohler, A., Voyron, S., Singan, V.R., Lindquist, E.A., Barry, K.W.,  
886 Girlanda, M., Grigoriev, I. V., Martin, F., *et al.* (2017) Fungal and plant gene expression in  
887 the *Tulasnella calospora*–*Serapias vomeracea* symbiosis provides clues about nitrogen  
888 pathways in orchid mycorrhizas. *New Phytol.*, 10.1111/nph.14279.
- 889 92. Harrison, P.W., Alako, B., Amid, C., Cerdeño-Tárraga, A., Cleland, I., Holt, S., Hussein, A.,  
890 Jayathilaka, S., Kay, S., Keane, T., *et al.* (2019) The European Nucleotide Archive in 2018.  
891 *Nucleic Acids Res.*, 10.1093/nar/gky1078.
- 892 93. Leinonen, R., Akhtar, R., Birney, E., Bower, L., Cerdano-Tárraga, A., Cheng, Y., Cleland, I.,  
893 Faruque, N., Goodgame, N., Gibson, R., *et al.* (2011) The European nucleotide archive.  
894 *Nucleic Acids Res.*, 10.1093/nar/gkq967.
- 895

896 **Figure legends**

897 **Figure 1. A. Circos plot.** The Circos plot represents the syntenic relationship between genomes  
898 of the different AGs of *Rhizoctonia solani* Kühn. Each line represents the region of genomic  
899 similarity predicted with Synima. Only the regions with coverage > 40,000 bases were  
900 enumerated and shown. B. The plot highlights the number of high-similarity syntenic regions  
901 (coverage > 40,000 bp) shared between each pair of genomes, including *T. calospora*. The red  
902 connection represents corresponding isolates sharing comparatively large number of syntenic  
903 relationships than other pair of isolates. Here, self-hits were removed or not shown. C. **ITS2**  
904 **phylogeny.** ITS2 sequences of the tester strain were obtained from the NCBI database and were  
905 clustered with ITS2 sequences from assembled *R. solani* genomes (highlighted with blue color  
906 and \*), along with ITS2 sequences from previously published *R. solani* genome assemblies  
907 (marked with \*\*). The phylogenetic tree was constructed using megax software with 10,000  
908 bootstrapping steps (see methods), after which resulting tree and corresponding alignment were  
909 visualized together using Phylogeny.IO.

910 **Figure 2. orthoMCL clustering of the predicted proteomes in *R. solani* AGs.** A. Heatmap  
911 showing protein conservation across all sequenced *R. solani* AGs and *T. calospora*. Each row  
912 represents one orthoMCL cluster, and color is proportional to the number of protein members  
913 shared within a given cluster from the given species (black: no member protein present; red:  
914 large number of protein members present). The hierarchical clustering (hclust; method:  
915 complete) analysis enumerates the similarities between different fungal isolates based on  
916 proteins shared by them across all orthoMCL clusters. B. **Cluster frequency.** The line plot  
917 represents the number of orthoMCL clusters shared by different fungal isolates used in this  
918 study. Example, > 1400 orthoMCL clusters are shared by 14 different fungal isolates (including

919 positive and negative controls) used in this study. The bimodal nature of plot represent high  
920 similarities across independent proteomes as large number of clusters shares protein members  
921 from  $\geq 13$  fungal isolates. The red line represents the smoothed curves after averaging out the  
922 number of clusters. C. **Protein classification based on the orthoMCL clusters.** The “core”  
923 proteins represent the sub-set of proteomes (from each *R. solani* AG and *T. calospora*) with  
924 conserved profile across all the isolates. Similarly, the “unique” sets represent the isolate-specific  
925 protein subset. The rest of the protein subsets make the “Auxillary” proteome which are  
926 conserved in a limited number of isolates. D. **Shared orthoMCL clusters.** The number of  
927 orthoMCL clusters shared between any two isolates. A shared cluster means, a given orthoMCL  
928 cluster contains proteins from both the isolates.

929 **Figure 3. InterPro domain analysis of the unique proteome.** In the unique proteome of each  
930 fungal isolate, InterPro protein domain families were predicted using InterProScan (Version  
931 5.45-80.0). Only the top 5 most enriched protein families are shown. The number marks the  
932 corresponding annotation of InterPro family domain in the circular bar plot.

933 **Figure 4. The Secreted Proteins.** A. Number of predicted proteins in the secretome of each  
934 fungal isolate (highlighted in yellow). The secreted proteins predicted in the unique proteome of  
935 each isolate is highlighted in red. B. Comparative analysis of top six highly enriched InterPro  
936 domains in the secretome.

937 **Figure 5. Effector Proteins.** A. The number of cysteine rich effector proteins predicted in the  
938 predicted secretome of each fungal isolate. B. The proportion of Cysteine observed across all the  
939 effectors predicted in each isolate. C. Topmost Enriched InterPro domains in Effector proteins of  
940 Rhizoctonia species (not *T. calospora*) and other basidiomycetes (including *T. calospora*). D.  
941 The comparative analysis of the distribution of number of effector proteins predicted in *R. solani*

942 AGs as compared to other Basidiomycetes. The p-value is computed using unpaired Wilcoxon-  
943 rank sum test.

944 **Figure 6. CAZymes.** A. The number of carbohydrate metabolizing enzymes (CAZymes)  
945 predicted in the proteome of each fungal isolate. B. Heatmap showing the CAZyme conservation  
946 across all the *R. solani* AGs and *T. calospora*. Each row represents one CAZy family of proteins,  
947 and color is proportional to the number of protein members shared within a given family from  
948 the given species (black: no member protein present; red: large number of protein members  
949 present). The hierarchical clustering (hclust; method: complete) enumerates the similarities  
950 between different fungal isolates based on proteins shared by them across all CAZy families. For  
951 simplicity only the CAZyme families enriched in more than 50 enzymes across all proteomes are  
952 shown.

Figure 1

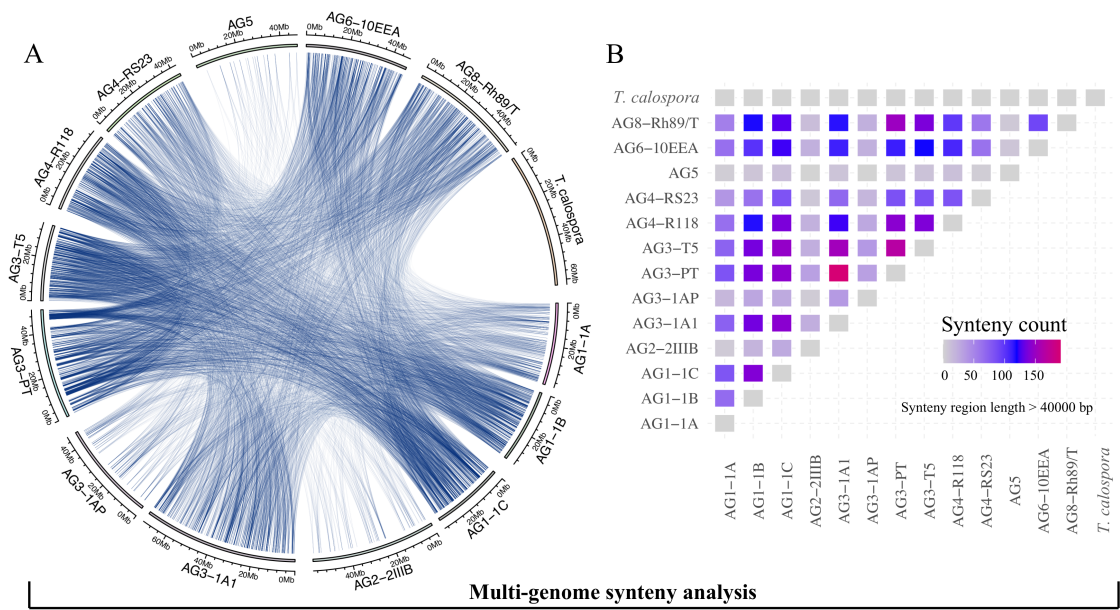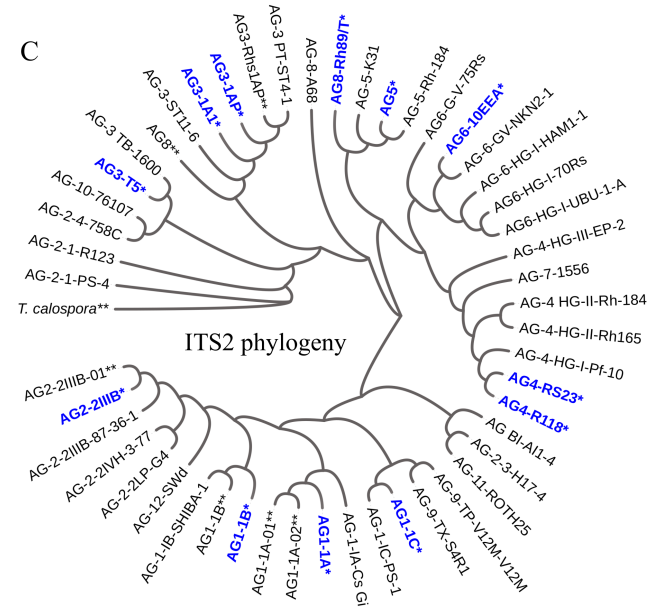

956

Figure 2

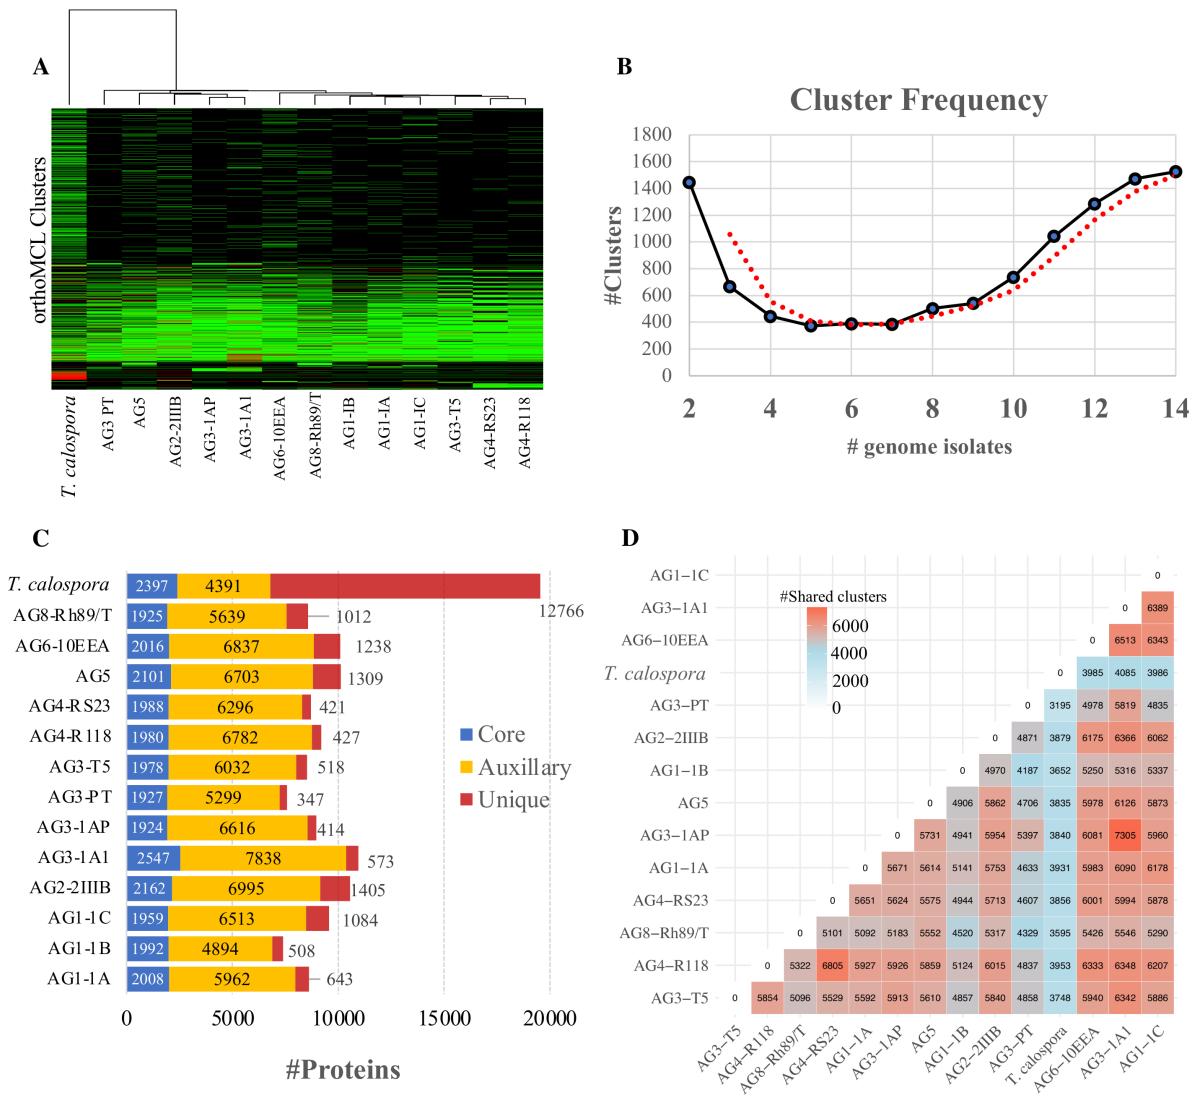

957

958

959

Figure 3

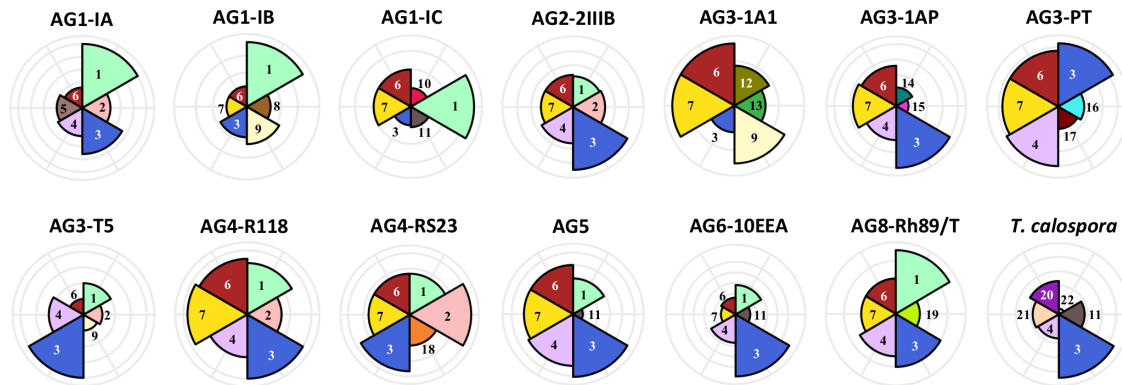

**InterPro Domains**

|    |                                                           |    |                                               |
|----|-----------------------------------------------------------|----|-----------------------------------------------|
| 1  | Cytochrome P450                                           | 12 | ABC transporter-like                          |
| 2  | Fungal Transcription Factor                               | 13 | Aminoacyl-tRNA synthetase (class-II)          |
| 3  | Protein Kinase Domain                                     | 14 | Multicopper oxidase (Type 2)                  |
| 4  | Serine-threonine/tyrosine protein kinase catalytic domain | 15 | Patatin like phospholipase domain             |
| 5  | Short chain dehydrogenase/reductase SDR                   | 16 | Ribosomal protein S4/S9                       |
| 6  | WD40 repeat containing domain                             | 17 | Ribosomal protein S4/S9 (Eukaryotic/Archaeal) |
| 7  | WD40 repeat                                               | 18 | Major facilitator superfamily domain          |
| 8  | NADH: Flavin Oxidoreductase/ NADH oxidase (N-terminal)    | 19 | Lysine-specific metallo-endopeptidase         |
| 9  | NADP-dependent oxidoreductase domain                      | 20 | Tetratricopeptide repeat-containing domain    |
| 10 | BTB/POZ domain                                            | 21 | Tetratricopeptide repeat                      |
| 11 | F-box domain                                              | 22 | Cytochrome P50                                |

960

961

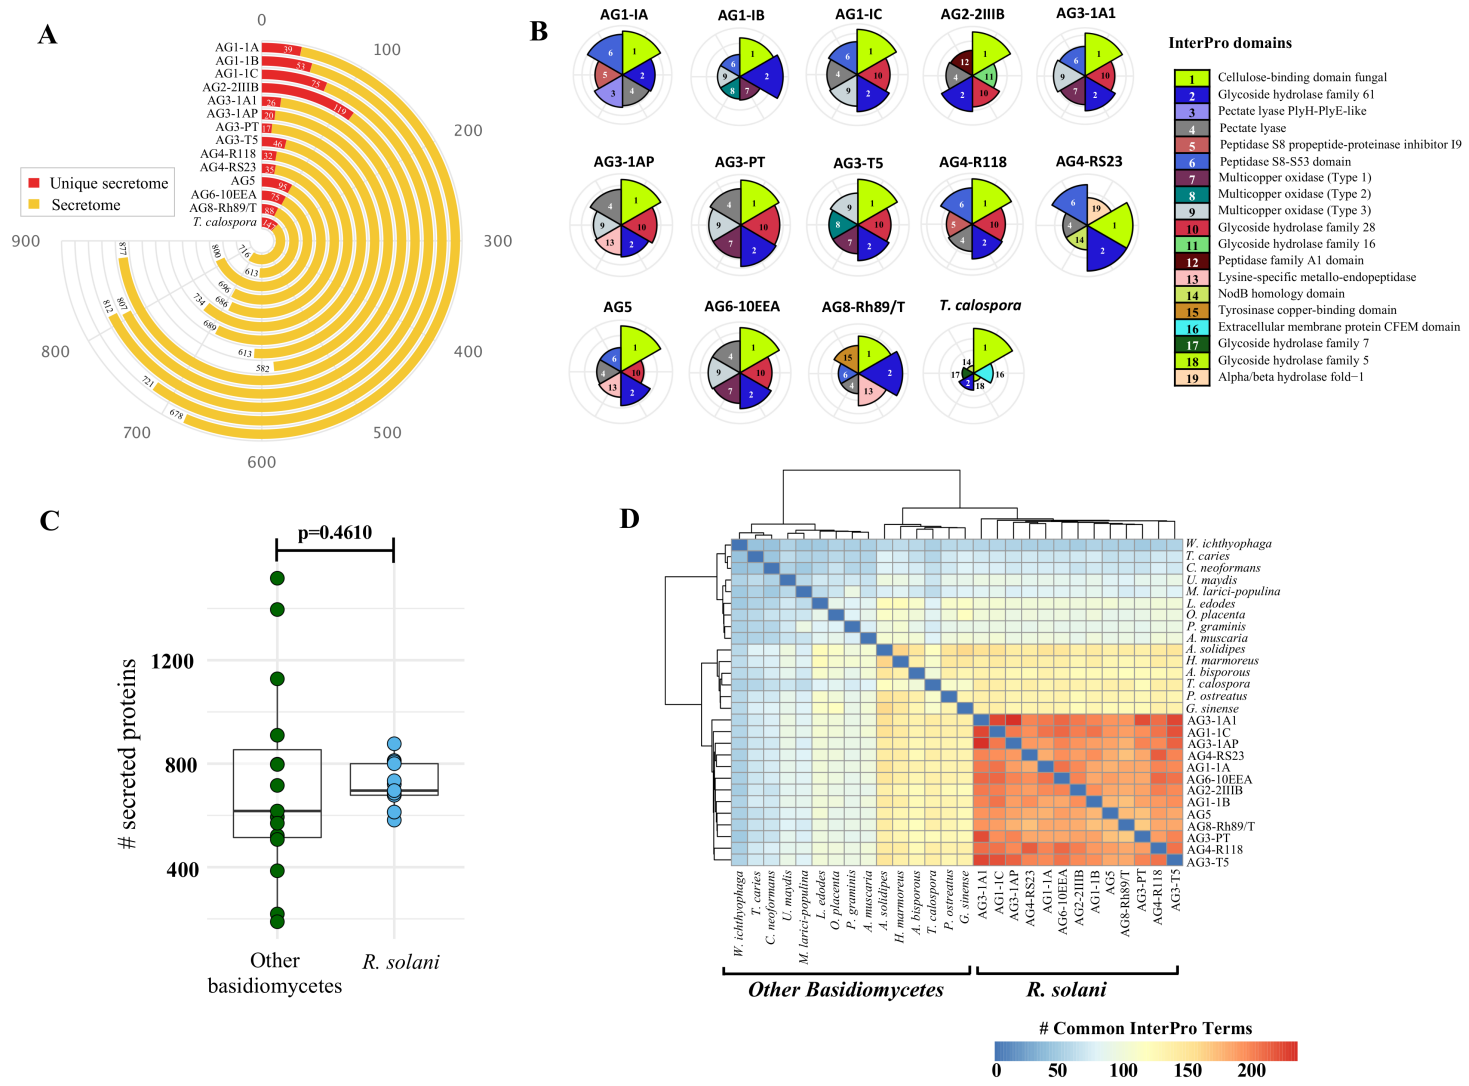



964

Figure 5

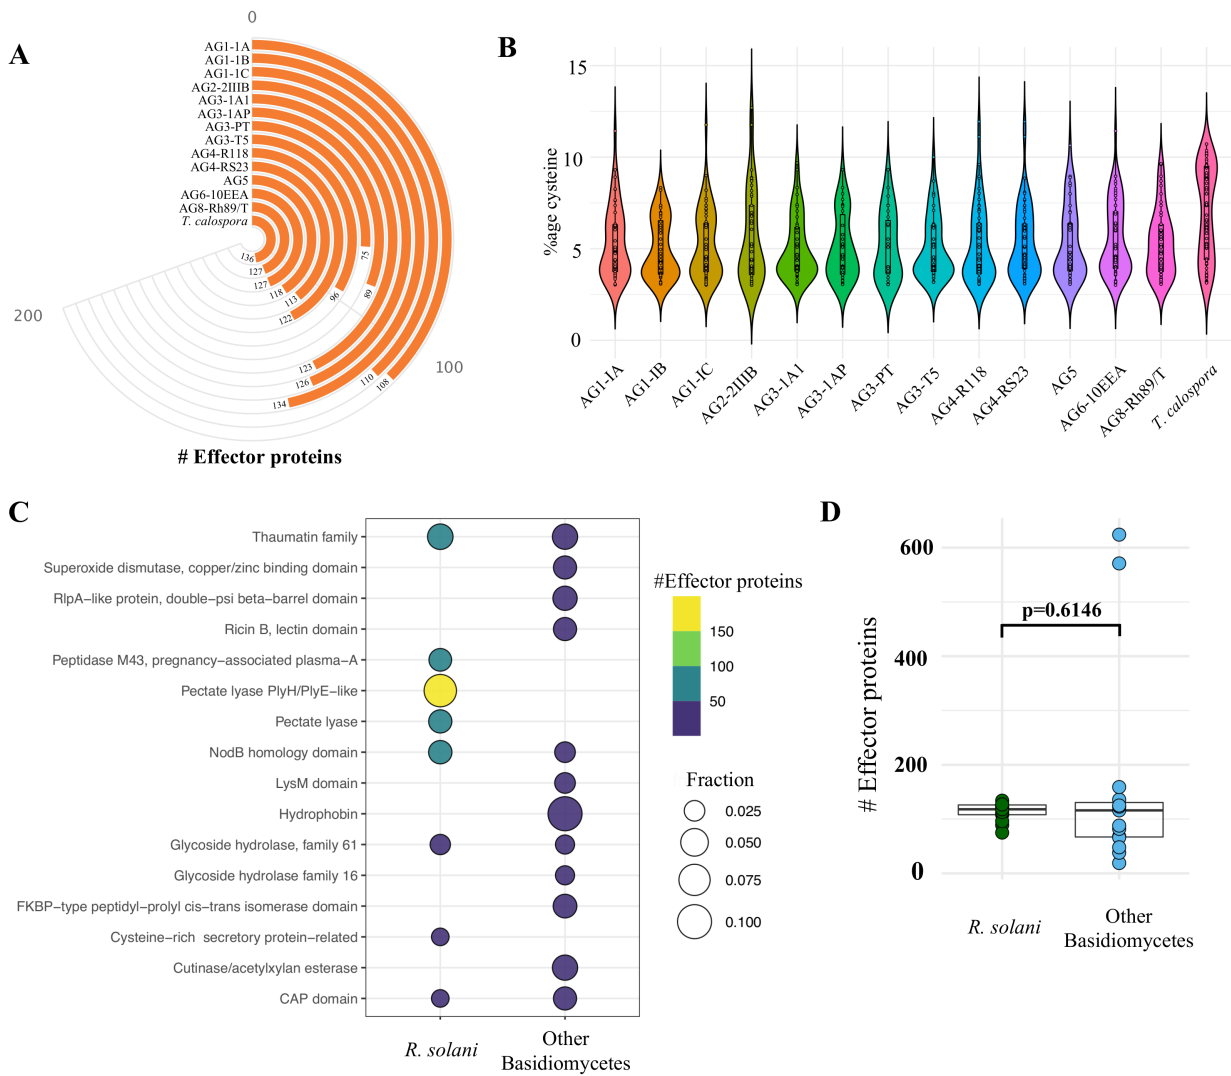

965

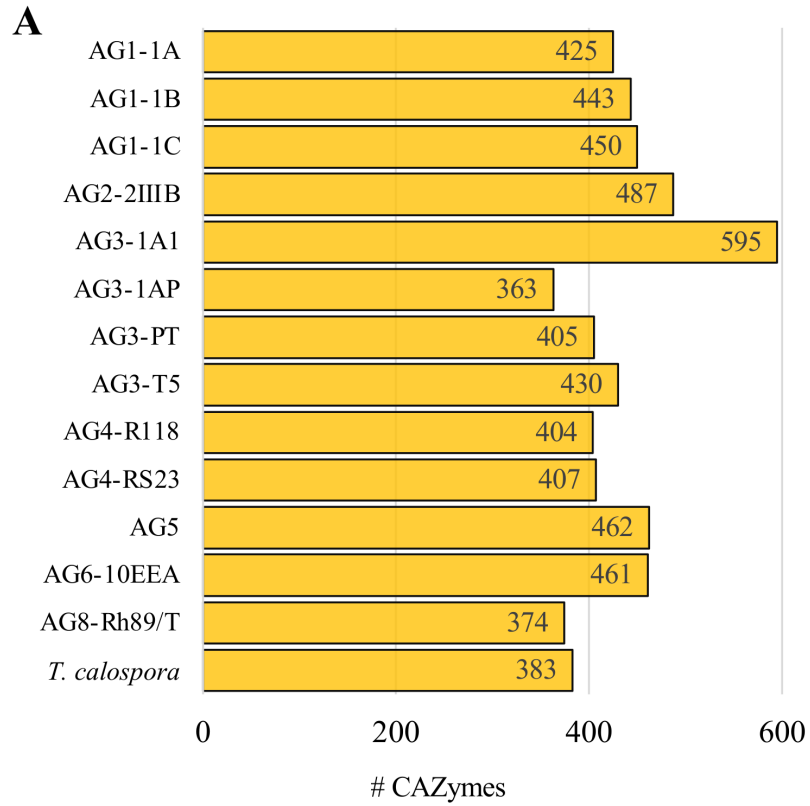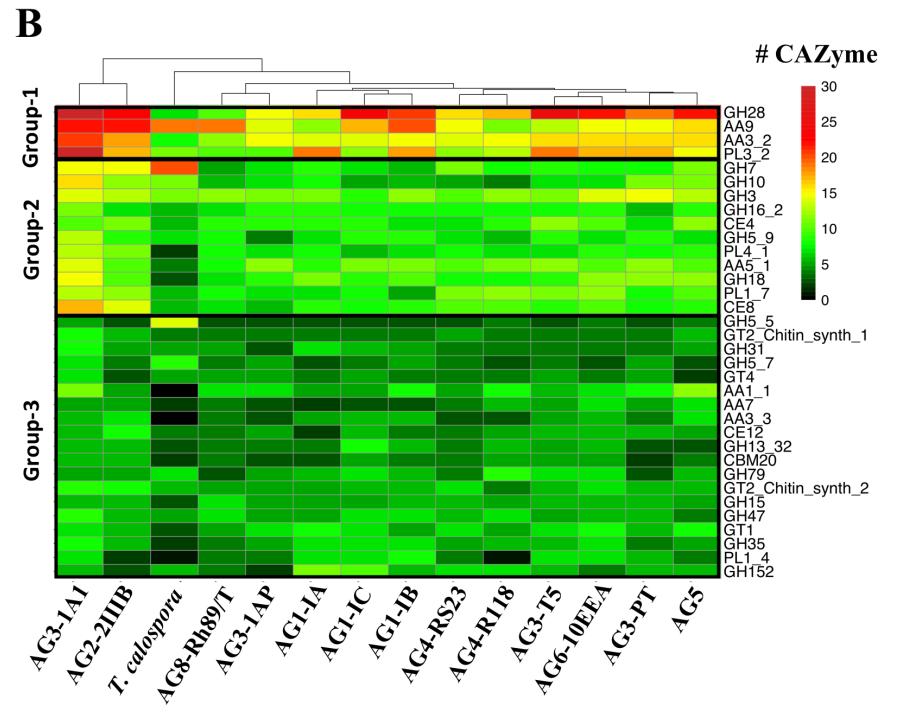

Source: http://biorxiv.org/content/10.1101/2020.12.18.423518v1.full.pdf
