# Supplementary material for: Pangenome analysis of the soil-borne fungal phytopathogen Rhizoctonia solani and development of a comprehensive web resource: RsolaniDB
Source: bioRxiv or medRxiv preprint supplement (doi:10.1101/2020.12.18.423518), 2020-12-21
Supplement: Supplementary file [file media-1.pdf]

Supplementary tables

| <b>Table S1.</b> Details of <i>Rhizoctonia solani</i> cultures used in the genomic investigation                                                                                                                                                                                                                                                                                             |            |                     |                     |                                                                                         |                       |                                            |
|----------------------------------------------------------------------------------------------------------------------------------------------------------------------------------------------------------------------------------------------------------------------------------------------------------------------------------------------------------------------------------------------|------------|---------------------|---------------------|-----------------------------------------------------------------------------------------|-----------------------|--------------------------------------------|
| <b>Isolate number</b>                                                                                                                                                                                                                                                                                                                                                                        | <b>AGs</b> | <b>AG subgroups</b> | <b>Isolate name</b> | <b>Plant Host</b>                                                                       | <b>Reference</b>      | <b>Obtained from</b>                       |
| 1                                                                                                                                                                                                                                                                                                                                                                                            | AG1        | AG1-IA              | BM1                 | Unknown                                                                                 | <i>in-lab</i> isolate | BM                                         |
| 2                                                                                                                                                                                                                                                                                                                                                                                            |            | AG1-IB              | BM2                 | Unknown                                                                                 | (1)                   | BM                                         |
| 3                                                                                                                                                                                                                                                                                                                                                                                            |            | AG1-IC*             | BM3                 | Unknown                                                                                 | (1)                   | BM                                         |
| 4                                                                                                                                                                                                                                                                                                                                                                                            | AG2        | AG2-2IIIB           | Rh-146              | Bentgrass, Georgia, USA                                                                 | (1)                   | LB                                         |
| 5                                                                                                                                                                                                                                                                                                                                                                                            | AG3        | AG3-PT              | Rhs1AP or 1AP       | Potato, Maine, USA<br>(This isolate was sequenced by Cubeta et al and named as Rhs 1AP) | (2, 3)                |                                            |
| 6                                                                                                                                                                                                                                                                                                                                                                                            |            |                     | Rhs1A1* or 1A1      | Sector, hypovirulent isolate of Rhs 1AP                                                 | (2)                   | <i>In lab</i> isolate                      |
| 7                                                                                                                                                                                                                                                                                                                                                                                            |            | AG3-TB*             | AG3-T5 or T5        | Tobacco, North Carolina, USA                                                            | (4)                   | MC                                         |
| 8                                                                                                                                                                                                                                                                                                                                                                                            | AG4*       | HG-I                | R118-11             | A basidiospore isolate of parent isolate R118 isolated from soil, Maryland, USA         | (5)                   | American Type Culture Collection, CN 16118 |
| 9                                                                                                                                                                                                                                                                                                                                                                                            |            |                     | RS23A or Rs23       | Soil, Maryland, USA                                                                     | (6, 7)                | <i>In lab</i> isolate                      |
| 10                                                                                                                                                                                                                                                                                                                                                                                           | AG5*       | N/D                 | 63/T                | Unknown                                                                                 | (1)                   | LB                                         |
| 11                                                                                                                                                                                                                                                                                                                                                                                           | AG6*       | N/D                 | 10EEA               | Sweet gum, North Carolina, USA                                                          | (1)                   | MC                                         |
| 12                                                                                                                                                                                                                                                                                                                                                                                           | AG8        | N/D                 | Rh89/T              | Oat root, Scotland                                                                      | (1)                   | LB                                         |
| <p>N/D = Sub-groups not identified or does not exist;<br/>           BM: Bruce Martin, Clemson University, South Carolina;<br/>           LB: Lee Burpee, University of Georgia;<br/>           MC: Marc Cubeta, North Carolina State University.<br/>           * first genome sequences reported in this study for a marked AG, a sub-group, or a sector-derived hypovirulent isolate.</p> |            |                     |                     |                                                                                         |                       |                                            |

| <b>Table S2:</b> Summary of genome libraries and sequencing reads. |                |              |                         |      |                  |                  |
|--------------------------------------------------------------------|----------------|--------------|-------------------------|------|------------------|------------------|
| AG subgroups                                                       | Isolate number | Library Type | Read Count <sup>#</sup> | GC % | Mean read length | RNAseq available |
| AG1-IA                                                             | BM1            | Paired end   | ~97M                    | 45   | 86               | Yes              |
| AG1-IB                                                             | BM2            | Paired end   | ~52M                    | 45   | 80               | -                |
|                                                                    |                | Paired end   | ~65M                    | 46   | 80               |                  |
| AG1-IC                                                             | BM3            | Paired end   | ~39M                    | 46   | 76               | -                |
|                                                                    |                | Mate-pair    | ~33M                    | 45   | 76               |                  |
| AG2-2IIIB                                                          | Rh-146         | Paired end   | ~157M                   | 45   | 85               | Yes              |
|                                                                    |                | Paired end   | ~41M                    | 46   | 82               |                  |
|                                                                    |                | Single end   | ~41M                    | 46   | 89               |                  |
| AG3-1A1                                                            | Rhs1A1         | Paired end   | ~105M                   | 44   | 76               | Yes              |
|                                                                    |                | Paired end   | ~37M                    | 47   | 82               |                  |
|                                                                    |                | Mate-pair    | ~21M                    | 47   | 69               |                  |
| AG3-1AP                                                            | Rhs1AP         | Paired end   | ~97M                    | 45   | 85               | -                |
| AG3-T5                                                             | *              | Paired end   | ~103M                   | 45   | 79               | Yes              |
|                                                                    |                | Paired end   | ~43M                    | 46   | 71               |                  |
|                                                                    |                | Mate-pair    | ~26M                    | 47   | 81               |                  |
| AG4-R118                                                           | *              | Paired end   | ~44M                    | 46   | 84               | Yes              |
|                                                                    |                | Paired end   | ~37M                    | 46   | 77               |                  |
|                                                                    |                | Mate-pair    | ~25M                    | 47   | 77               |                  |
| AG4-RS23                                                           | *              | Paired end   | ~130M                   | 46   | 84               | -                |
| AG5                                                                | 63/T           | Paired end   | ~38M                    | 47   | 76               | Yes              |
|                                                                    |                | Mate-pair    | ~27M                    | 48   | 77               |                  |
| AG6-10EEA                                                          | *              | Paired end   | ~42M                    | 47   | 76               | -                |
|                                                                    |                | Mate-pair    | ~42M                    | 46   | 75               |                  |
| AG8                                                                | Rh89/T         | Paired end   | ~22M                    | 46   | 80               | -                |
|                                                                    |                | Paired end   | ~48M                    | 46   | 71               |                  |
|                                                                    |                | Paired end   | ~37M                    | 45   | 76               |                  |
|                                                                    |                | Mate-pair    | ~44M                    | 45   | 76               |                  |

# in millions; QC, trimmed and error corrected reads

\* Not available

20

21

**Table S3: Assembly properties of genomes reported in this study**

|            | Genome Length | GC (%) | # contigs | N50     | # N's per 100 kbp | Largest contig length | BUSCO  | Repetitive genome (%age) |
|------------|---------------|--------|-----------|---------|-------------------|-----------------------|--------|--------------------------|
| AG1-1A     | 46,986,790    | 47.47  | 9,145     | 13,594  | 10.92             | 162,406               | 89.30% | 1.47                     |
| AG1-1B     | 34,314,604    | 48.34  | 1,833     | 69,438  | 3.86              | 607,833               | 95.80% | 0.68                     |
| AG1-1C     | 33,636,943    | 48.07  | 1,221     | 100,597 | 800.74            | 921,812               | 93.40% | 0.56                     |
| AG2-2IIIB  | 57,816,428    | 48     | 10,766    | 11,419  | 5.53              | 76,418                | 92.10% | 0.82                     |
| AG3-1A1    | 71,708,704    | 49.05  | 7,116     | 29,147  | 579.62            | 485,982               | 96.50% | 0.72                     |
| AG3-1AP    | 46,445,294    | 48.23  | 10,166    | 8,499   | 7.87              | 213,864               | 90.30% | 0.78                     |
| AG3-T5     | 35,199,394    | 48.68  | 678       | 196,133 | 1629.7            | 79,7852               | 95.20% | 0.75                     |
| AG4-R118   | 38,232,519    | 48.45  | 1,860     | 52,568  | 597.37            | 638,355               | 91.30% | 0.65                     |
| AG4-RS23   | 42,733,718    | 48.22  | 4,504     | 19,406  | 47.48             | 232,254               | 89.60% | 0.88                     |
| AG5        | 47,761,425    | 49.01  | 6,674     | 12,763  | 1961.37           | 85,396                | 88.70% | 0.58                     |
| AG6-10EEA  | 47,563,091    | 49.07  | 4,274     | 25,715  | 1465.94           | 373,768               | 94.10% | 0.78                     |
| AG8-Rh89/T | 56,054,626    | 48.56  | 11,793    | 31,591  | 3496.17           | 318,132               | 93.50% | 0.53                     |

| Table S4. Taxonomic placement of <i>Rhizoctonia solani</i> and selected other basidiomycetes genomes used for comparative analysis |                                              |                     |                                             |                          |                                                                                                                                                                              |
|------------------------------------------------------------------------------------------------------------------------------------|----------------------------------------------|---------------------|---------------------------------------------|--------------------------|------------------------------------------------------------------------------------------------------------------------------------------------------------------------------|
| Sub-Division                                                                                                                       | Class                                        | Subclass            | Order                                       | Family                   | Species, ENA Accession                                                                                                                                                       |
| Agaricomycotina                                                                                                                    | Agaricomycetes                               |                     | Cantharellales<br>( <i>Incertae sedis</i> ) | <u>Ceratobasidiaceae</u> | <i>Rhizoctonia solani</i> (Teleomorph: <i>Thanatephorus cucumeris</i> ; soilborne plant pathogens)                                                                           |
|                                                                                                                                    |                                              |                     |                                             | <u>Tulasnellaceae</u>    | <i>Tulasnella calospora</i> (Patch-forming fungus; <a href="https://mycocosm.jgi.doe.gov/Tulca1/Tulca1.home.html">https://mycocosm.jgi.doe.gov/Tulca1/Tulca1.home.html</a> ) |
|                                                                                                                                    |                                              |                     | Polyporales ( <i>Incertae sedis</i> )       | Fomitopsidaceae          | <i>Postia placenta</i> (Brown rot fungus; GCA_002117355)                                                                                                                     |
|                                                                                                                                    |                                              |                     |                                             | Ganodermaceae            | <i>Ganoderma sinense</i> (Black Reishi; GCA_002760635)                                                                                                                       |
|                                                                                                                                    |                                              |                     | Agaricales                                  | Agaricaceae              | <i>Agaricus bisporus</i> (Button mushroom; GCA_000300555)                                                                                                                    |
|                                                                                                                                    |                                              |                     |                                             | Pleuroptaceae            | <i>Pleurotus ostreatus</i> (Oyster mushroom; GCA_000697685)                                                                                                                  |
|                                                                                                                                    |                                              |                     |                                             | Amanitaceae              | <i>Amanita muscaria</i> (Fly agaric; GCA_000827485)                                                                                                                          |
|                                                                                                                                    |                                              |                     |                                             | Omphalotaceae            | <i>Lentinula edodes</i> (Shiitake; GCA_002003045)                                                                                                                            |
|                                                                                                                                    |                                              |                     |                                             |                          | <i>Hypsizygus marmoreus</i> (Synonym: <i>H. tessellatus</i> ; White clamshell mushroom; GCA_001605315)                                                                       |
|                                                                                                                                    |                                              |                     |                                             | Physalacreaceae          | <i>Armillaria solidipes</i> (Synonym: <i>A. ostoyae</i> ; Humongous fungus; Wood or root decays of conifers; GCA_002307675)                                                  |
|                                                                                                                                    | Tremellomycetes                              |                     | Tremellales                                 | Tremellaceae             | <i>Cryptococcus neoformans</i> (Teleomorph: <i>Filobasidiella neoformans</i> ; Animal pathogen; GCA_002215885)                                                               |
|                                                                                                                                    | Wallemiomycetes<br>( <i>incertae sedis</i> ) |                     |                                             |                          | <i>Wallemia ichthyophaga</i> ( <i>Halophilic fungus</i> ; GCA_000400465)                                                                                                     |
| Pucciniomycotina                                                                                                                   | Pucciniomycetes                              |                     | Pucciniales                                 | Pucciniaceae             | <i>Puccinia graminis</i> (Stem rust; GCA_000149925.1)                                                                                                                        |
|                                                                                                                                    |                                              |                     |                                             | Melampsoraceae           | <i>Melampsora larici-populina</i> (Poplar leaf rust; GCA_000204055.1)                                                                                                        |
| Ustilaginomycotina                                                                                                                 | Exobasidiomycetes                            | Exobasidiomycetidae | Tilletiales                                 | Tilletiaceae             | <i>Tilletia caries</i> (Common bunt; GCA_001645005)                                                                                                                          |
|                                                                                                                                    | Ustilaginomycetes                            |                     | Ustilaginales                               | Ustilaginaceae           | <i>Ustilago maydis</i> (Corn smut; GCA_000328475.2)                                                                                                                          |

24 **References**

25  
26  
27  
28  
29  
30  
31  
32  
33  
34  
35  
36  
37  
38  
39  
40  
41  
42  
43  
44  
45  
46  
47  
48

1. Amaradasa, B.S., Lakshman, D., Horvath, B.J. and Amundsen, K.L. (2014) Development of SCAR markers and UP-PCR cross-hybridization method for specific detection of four major subgroups of *Rhizoctonia* from infected turfgrasses. *Mycologia*, 10.3852/13-006.
2. Lakshman, D.K. and Tavantzis, S.M. (1994) Spontaneous appearance of genetically distinct double-stranded RNA elements in *Rhizoctonia solani*. *Phytopathology*, 10.1094/Phyto-84-633.
3. Cubeta, M.A., Thomas, E., Dean, R.A., Jabaji, S., Neate, S.M., Tavantzis, S., Toda, T., Vilgalys, R., Bharathan, N., Fedorova-Abrams, N., *et al.* (2014) Draft genome sequence of the plant-pathogenic soil fungus *Rhizoctonia solani* anastomosis group 3 strain Rhs1AP. *Genome Announc.*, 10.1128/genomeA.01072-14.
4. Johnk, J.S., Jones, R.K., Shew, H.D. and Carling, D.E. (1993) Characterization of populations of *Rhizoctonia solani* AG-3 from potato and tobacco. *Phytopathology*, **83**, 854–858.
5. Papavizas, G. C. and Ayers, W.A. (1965) Virulence, host range, and pectolytic enzymes of single-basidiospore isolates of *Rhizoctonia praticola* and *Rhizoctonia solani*. *Phytopathology*, **55**, 111–116.
6. Lewis, J.A. and Papavizas, G.C. (1987) Reduction of inoculum of *Rhizoctonia solani* in soil by germlings of *Trichoderma hamatum*. *Soil Biol. Biochem.*, 10.1016/0038-0717(87)90081-2.
7. Lakshman, D.K., Roberts, D.P., Garrett, W.M., Natarajan, S.S., Darwish, O., Alkharouf, N., Pain, A., Khan, F., Jambhulkar, P.P. and Mitra, A. (2016) Proteomic Investigation of *Rhizoctonia solani* AG 4 Identifies Secretome and Mycelial Proteins with Roles in Plant Cell Wall Degradation and Virulence. *J. Agric. Food Chem.*, 10.1021/acs.jafc.5b05735.

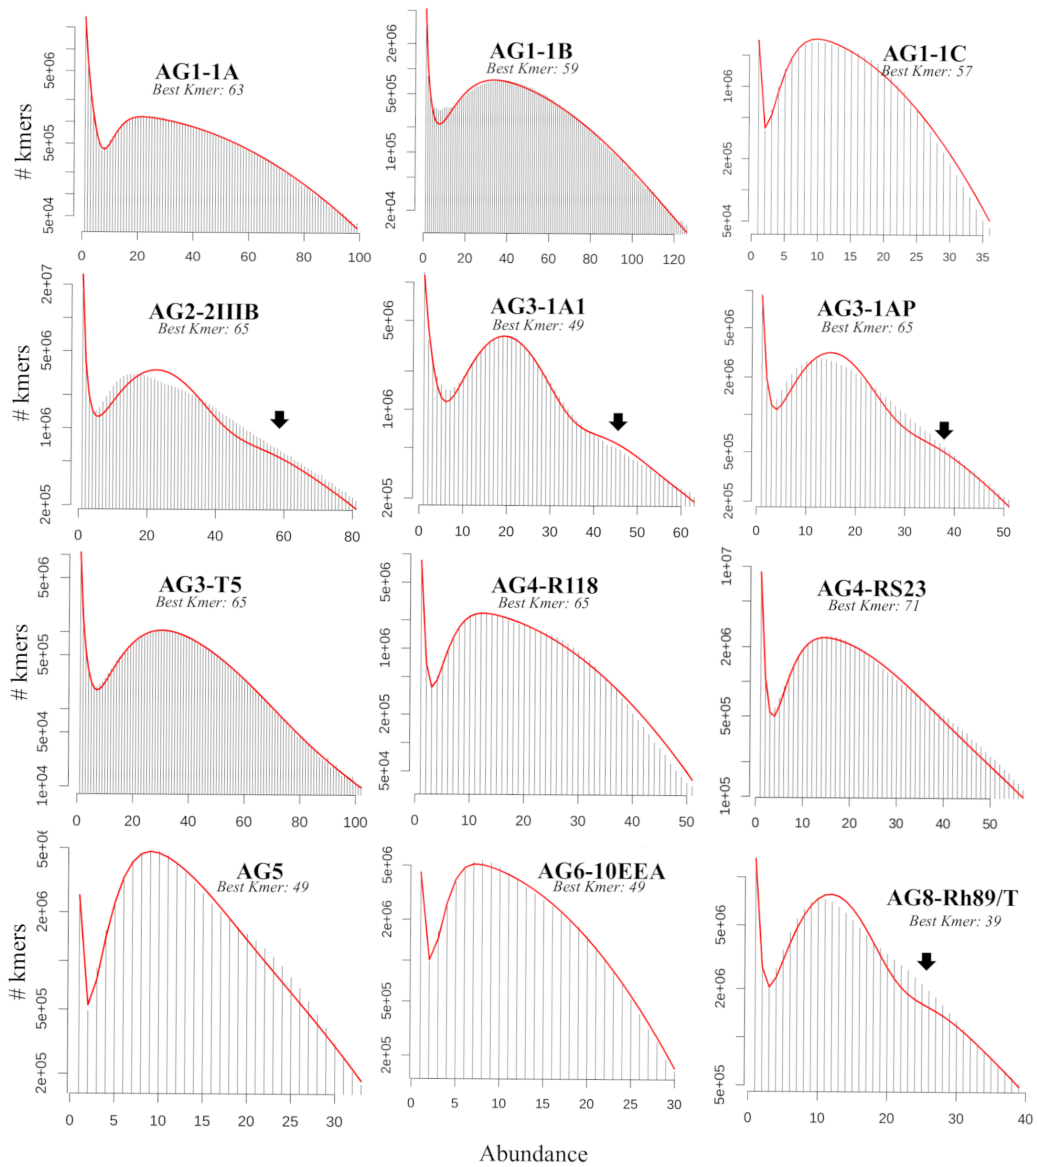

54 **Figure S1.** *k*-mer distribution. Histogram with the number of *k*-mers having a given count for the  
 55 best *k*-mer length, plotted using `-histo` module of `jellyfish` program. The x-axis represent number  
 56 of *k*-mers observed with a given *k*-mer count (y-axis). Arrow marks the shoulder peaks that  
 57 represent sequence-level heterogeneity or multi-nucleate features in the genome sequencing data.  
 58



59  
60  
61  
62

Figure S2

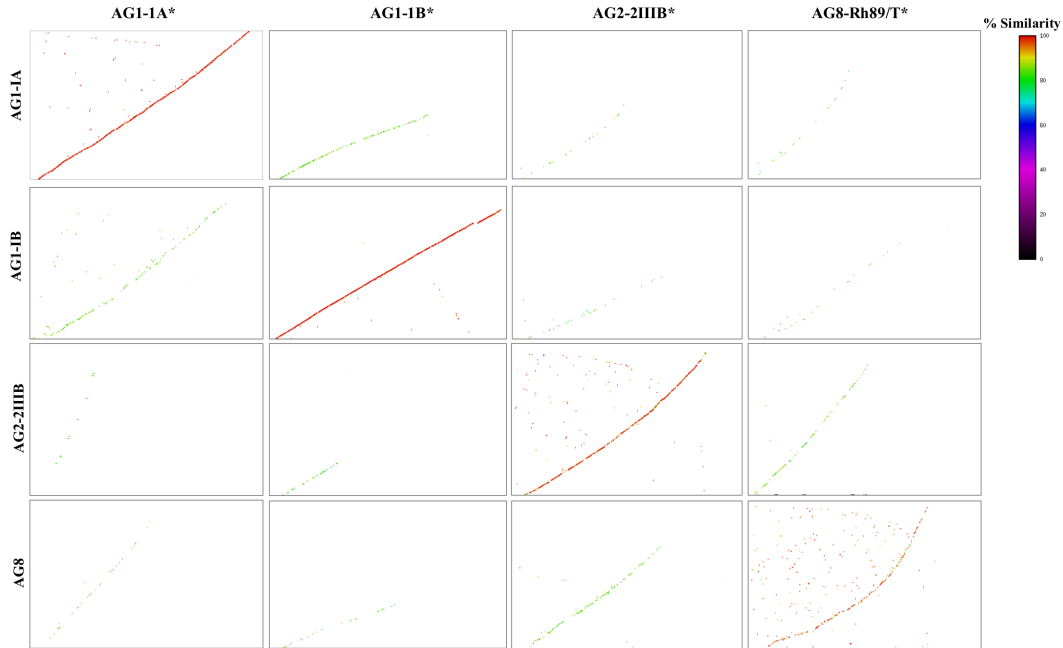

63  
64 **Figure S2:** Mummer plots of aligned genomic scaffolds of *R. solani* AGs between previously  
65 published genomes and de novo genome assemblies (marked with \*) produced in this study. The  
66 red dots represent high sequence similarity between aligned genomic scaffolds. The scaffolds  
67 were aligned using nucmer program and plotted with mummer plot with `-filter` and `-layout`  
68 arguments.  
69

70  
71

Figure S3

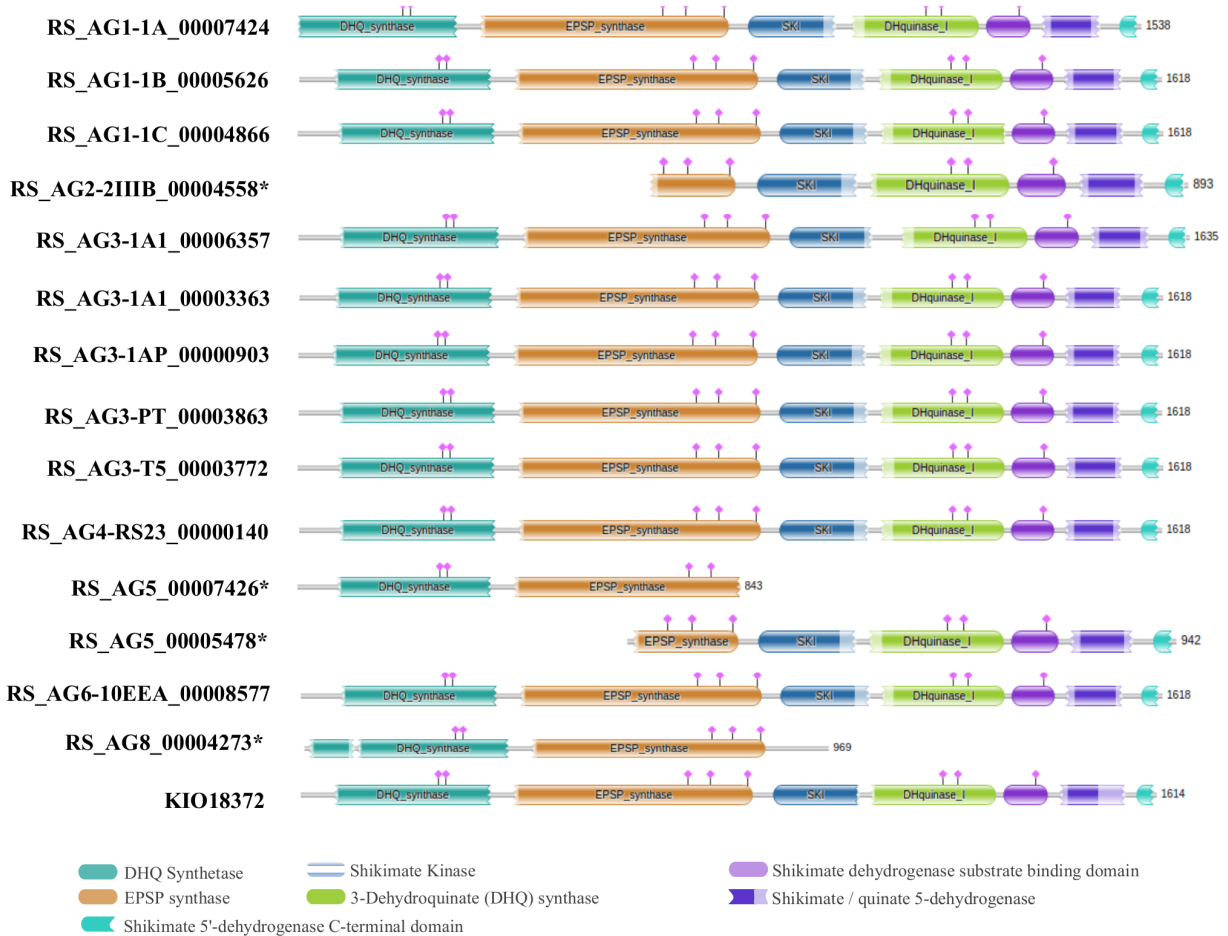

72  
73  
74  
75  
76  
77  
78

**Figure S3:** A schematic representation of the AROM sequences. The multi-functional AROM sequences predicted in each of the *R. solani* and *T. calospora* genomes are shown. Isolates with partial AROM sequences are marked with \*. The domains are predicted and plotted using HMMER webserver (see methods).

79  
80  
81

Figure S4

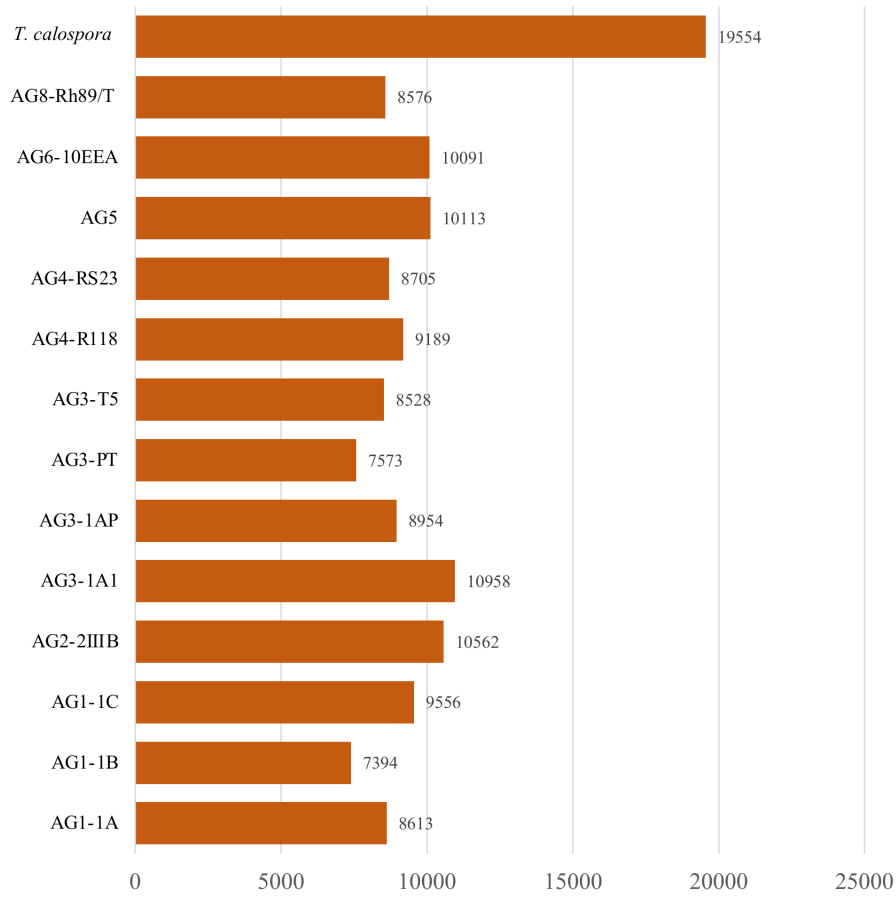

82  
83  
84  
85  
86  
87

**Figure S4.** The number of protein coding transcripts/proteins predicted in each of the given isolate used in this study.

88  
89

Figure S5

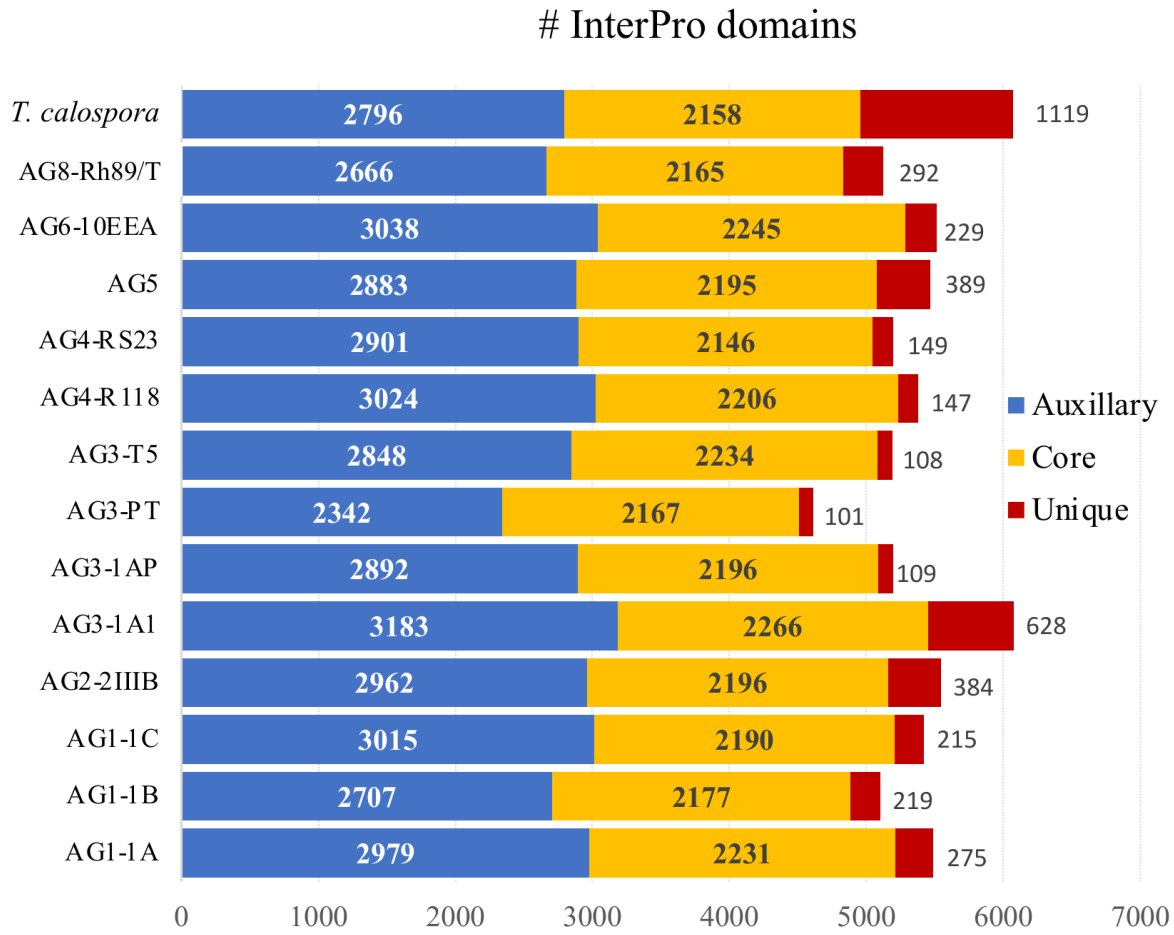

90  
91  
92  
93  
94

**Figure S5: Interpro domain families.** In each isolate, for each type of protein (core, unique and auxiliary), interpro domain families were enumerated. The stacked bar plot shows the number of interpro families enriched with the different protein types in each fungal isolate.

95  
96

Figure S6

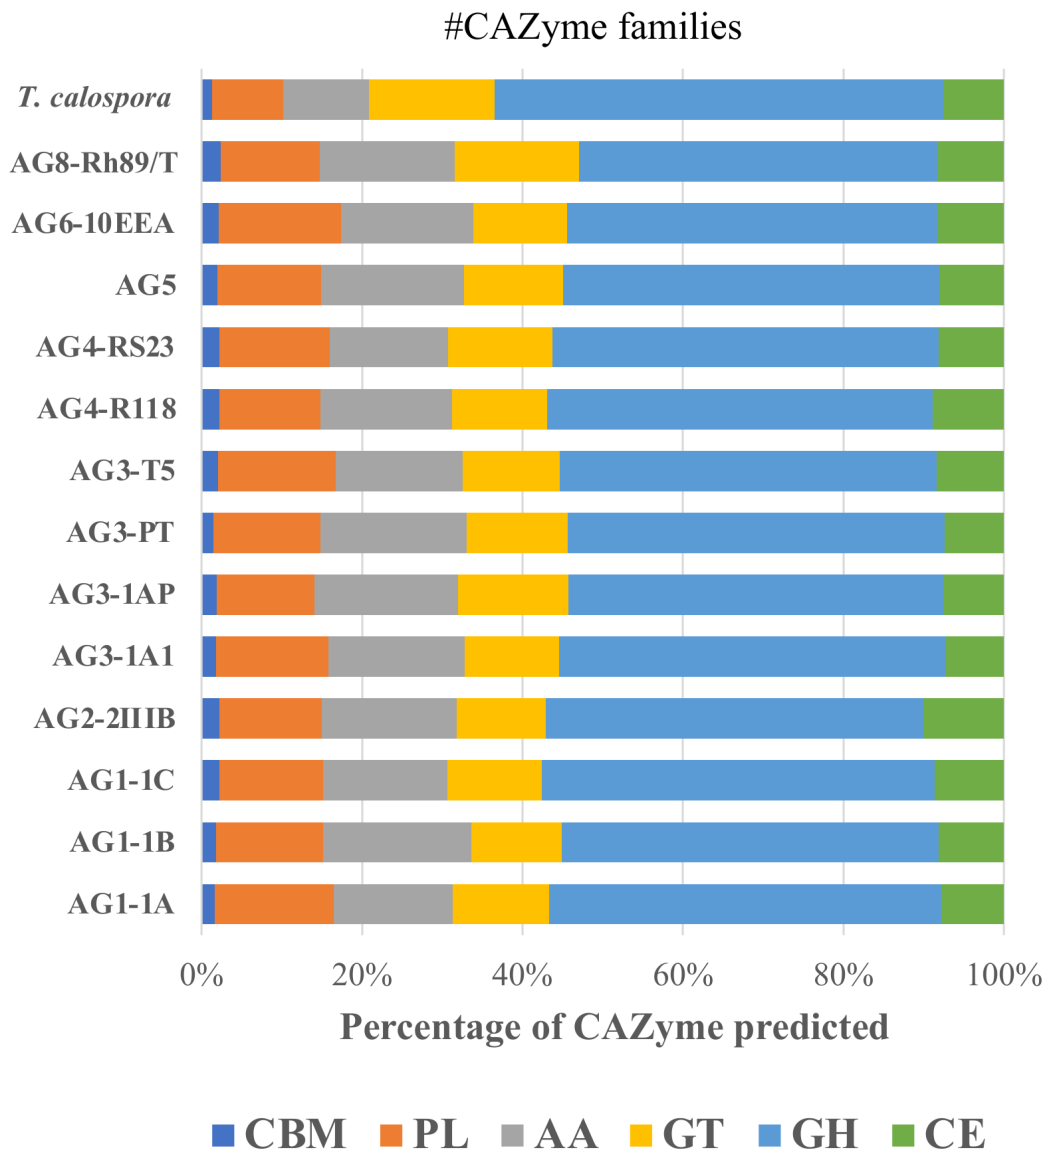

97  
98  
99  
100

**Figure S6:** CAZyme families. The proportion of proteins, belonging to six different carbohydrate metabolizing families of proteins, predicted in each of the given fungal isolates.

101  
102

Figure S7

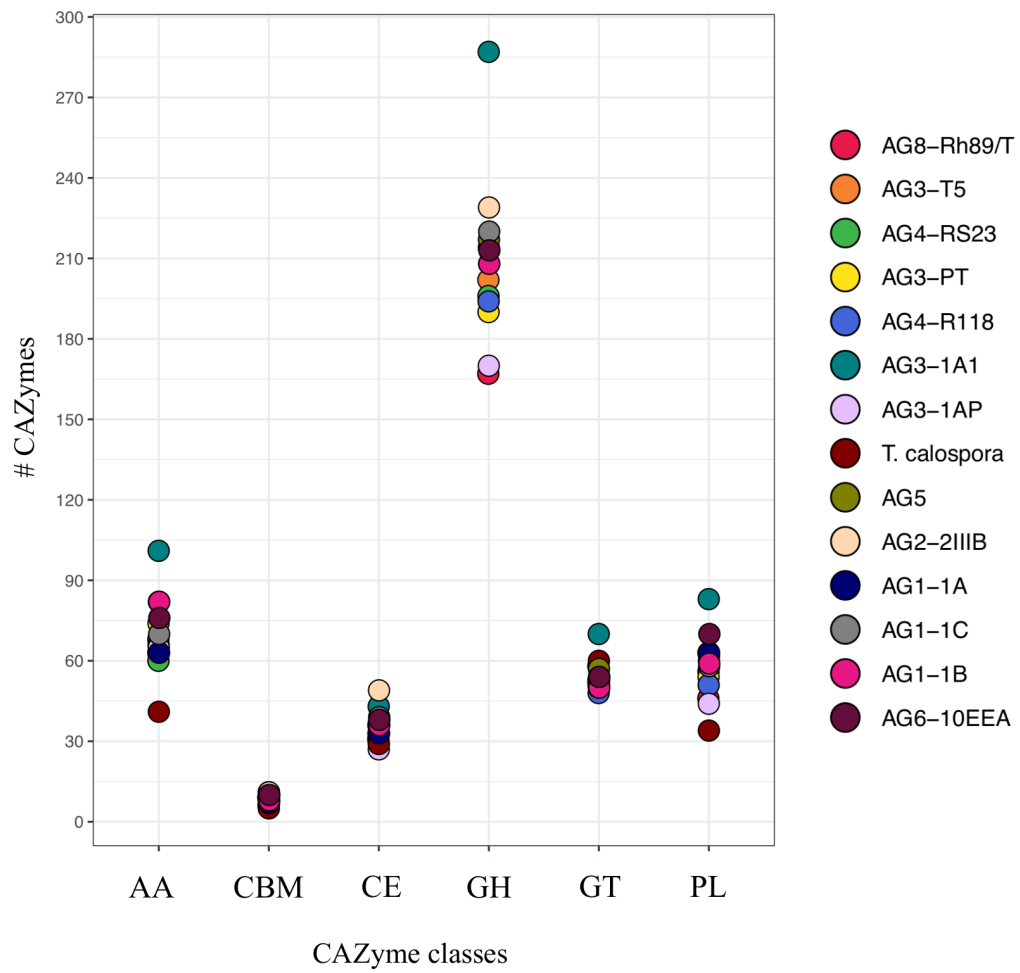

103

**Figure S7. CAZyme.** The number of CAZymes belonging to different classes, predicted in *R. solani* isolates and *T. calospora*.

104  
105  
106

Figure S8

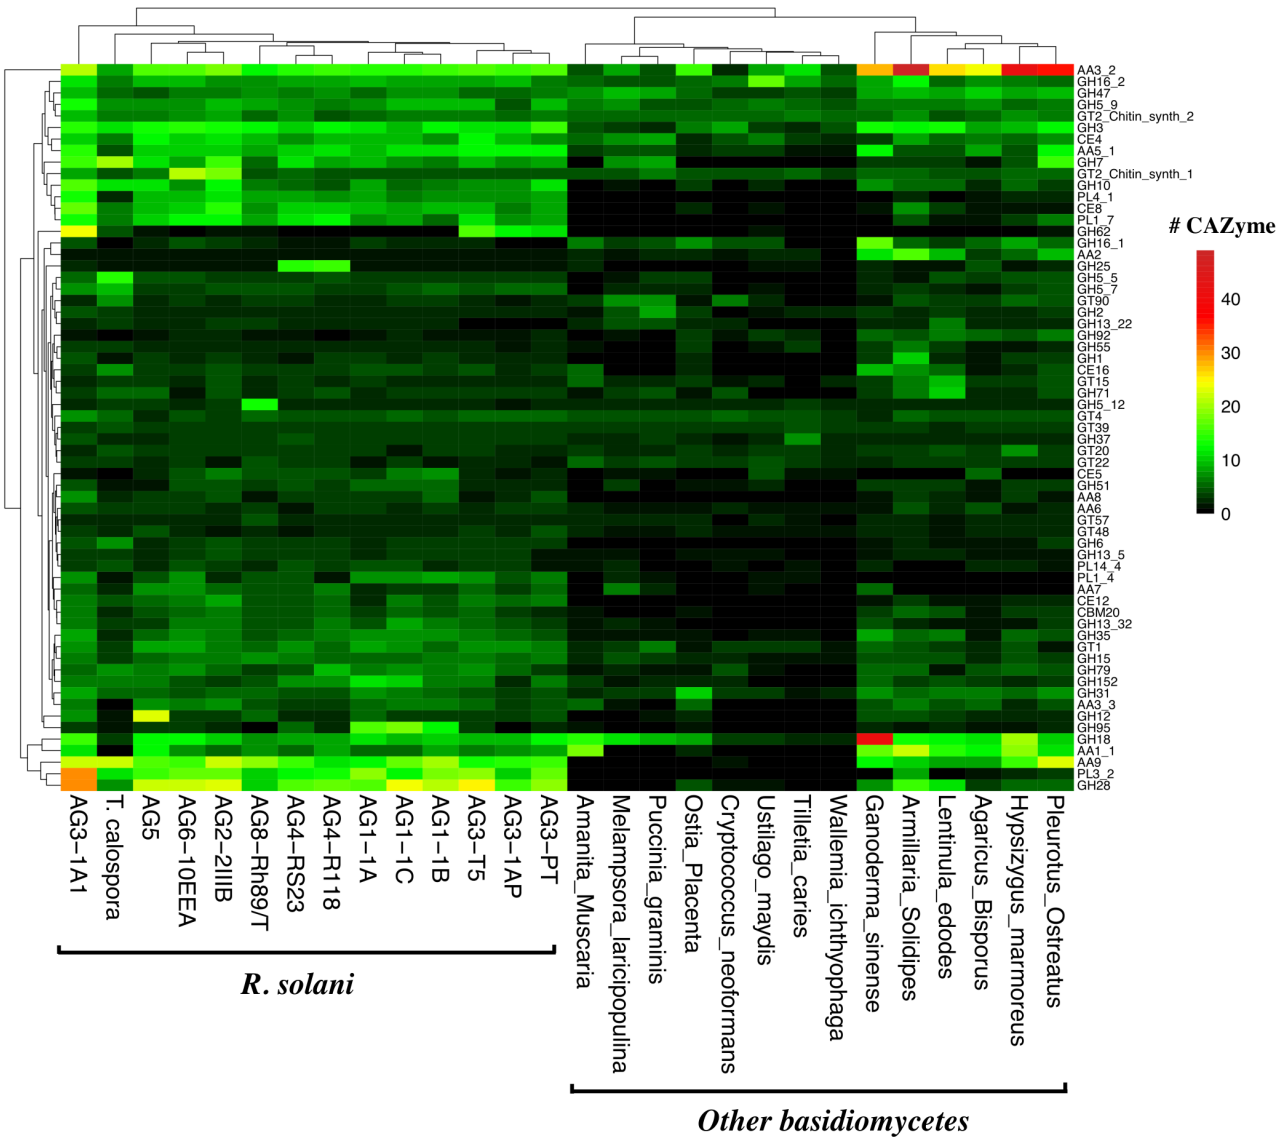

107  
108

**Figure S8. CAZyme.** Heatmap showing the topmost CAZyme family predicted in the proteomes of all the *R solani* AGs, *T calospora* and other basidiomycetes. Each row represents one CAZy family of proteins, and color is proportional to the number of protein member shared in a given family from the given species (black: no member protein; red: large number of members). The phylogenetic analysis enumerates the distance between different fungal isolates based on proteins shared by them across all CAZy families. For simplicity only the CAZyme families enriched in more than 50 proteins across all proteomes were shown.
